44        **Population genomics of bank vole populations reveals associations between**  
45        **immune related genes and the epidemiology of Puumala hantavirus in Sweden**

46

47    Audrey Rohfritsch<sup>1#</sup>, Maxime Galan<sup>1#</sup>, Mathieu Gautier<sup>1</sup>, Karim Gharbi<sup>2</sup>, Gert Olsson<sup>3</sup>,  
48    Bernhard Gschloessl<sup>1</sup>, Caroline Zeimes<sup>4</sup>, Sophie VanWambeke<sup>4</sup>, Renaud Vitalis<sup>1</sup>, Nathalie  
49    Charbonnel<sup>1\*</sup>

50

51    <sup>1</sup> CBGP, INRA, CIRAD, IRD, Montpellier SupAgro, Univ. Montpellier, Montpellier, France. E-  
52    mail: [nathalie.charbonnel@inra.fr](mailto:nathalie.charbonnel@inra.fr)

53    <sup>2</sup> Genome Science, Edinburgh Genomics, Ashworth Laboratories, The University of  
54    Edinburgh, Edinburgh, EH9 3FL, UK

55    <sup>3</sup> Department of Wildlife, Fish, and Environmental Studies, SLU, SE- 901 83 Umeå, Sweden

56    <sup>4</sup> Georges Lemaître Centre for Earth and Climate Research, Earth and Life Institute,  
57    Université Catholique de Louvain (UCL), Louvain-la-Neuve, Belgium

58    #These authors contributed equally to this work.

59

60    **Keywords:** RAD-sequencing, adaptation, hantavirus, voles, molecular epidemiology,  
61    selection

62    \*Corresponding author: Charbonnel Nathalie, 750 avenue du campus Agropolis, CS  
63    30016, F-34988 Montferrier-sur-Lez, France. Fax : +0033 (0)4 99 62 33 45. E-mail:  
64    [nathalie.charbonnel@inra.fr](mailto:nathalie.charbonnel@inra.fr)

65    **Running title:** Bank vole population genomics and hantavirus

66 **Abstract**

67 Infectious pathogens are major selective forces acting on individuals. The recent advent  
68 of high-throughput sequencing technologies now enables to investigate the genetic  
69 bases of resistance/susceptibility to infections in non-model organisms. From an  
70 evolutionary perspective, the analysis of the genetic diversity observed at these genes in  
71 natural populations provides insight into the mechanisms maintaining polymorphism  
72 and their epidemiological consequences. We explored these questions in the context of  
73 the interactions between Puumala hantavirus (PUUV) and its reservoir host, the bank  
74 vole *Myodes glareolus*. Despite the continuous spatial distribution of *M. glareolus* in  
75 Europe, PUUV distribution is strongly heterogeneous. Different defence strategies might  
76 have evolved in bank voles as a result of co-adaptation with PUUV, which may in turn  
77 reinforce spatial heterogeneity in PUUV distribution. We performed a genome scan  
78 study of six bank vole populations sampled along a North/South transect in Sweden,  
79 including PUUV endemic and non-endemic areas. We combined candidate gene analyses  
80 (*Tlr4*, *Tlr7*, *Mx2* genes) and high throughput sequencing of RAD (Restriction-site  
81 Associated DNA) markers. We found evidence for outlier loci showing high levels of  
82 genetic differentiation. Ten outliers among the 52 that matched to mouse protein-coding  
83 genes corresponded to immune related genes and were detected using ecological  
84 associations with variations in PUUV prevalence. One third of the enriched pathways  
85 concerned immune processes, including platelet activation and TLR pathway. In the  
86 future, functional experimentations should enable to confirm the role of these these  
87 immune related genes with regard to the interactions between *M. glareolus* and PUUV.

88

## 89 **Introduction**

90 Infections are among the strongest selective forces acting in natural populations  
91 (Fumagalli et al., 2011; Karlsson, Kwiatkowski, & Sabeti, 2014). As a consequence, hosts  
92 have evolved a wide range of defence mechanisms against their pathogens.  
93 Understanding variation in host defence mechanisms has been at the core of eco-  
94 immunology in the last two decades (Sheldon & Verhulst, 1996). This immuno-  
95 heterogeneity seems to be strongly driven by non-heritable influences (e.g., age,  
96 physiological status, resource availability, microbial exposure, history of infections  
97 during lifetime, Schmid-Hempel, 2003; Schulenburg, Kurtz, Moret, & Siva-Jothy, 2009). It  
98 also has a genetic basis that is highly correlated to immune-related genes (Barreiro &  
99 Quintana-Murci, 2010; Hill et al., 1994). In this context, population genetics approaches  
100 may help deciphering the relative influence of different evolutionary processes  
101 (including migration, drift, and selection) in shaping the variation of immune-related  
102 genes in space and time (Charbonnel & Cosson, 2011; Quintana-Murci & Clark, 2013). In  
103 turn, the analysis of the genetic diversity observed at immune-related genes in natural  
104 populations enables to elucidate some geographical patterns of pathogen distribution.  
105 Still, only few studies address the question of how pathogen-mediated selective  
106 processes in the hosts may shape the spatial distribution of pathogens but see (Guivier,  
107 Galan, Henttonen, Cosson, & Charbonnel, 2014; Guivier et al., 2010; Wenzel, Douglas,  
108 James, Redpath, & Piertney, 2016).

109 A particularly relevant study system to tackle these questions consists of the  
110 interaction between the hantavirus Puumala (PUUV), the causative agent of  
111 nephropathia epidemica in humans (Brummer-Korvenkotio, Henttonen, & Vaheri,  
112 1982), and its reservoir host, the bank vole *Myodes glareolus*. Despite the continuous

113 spatial distribution of *M. glareolus* in Europe (Stenseth, 1985), PUUV distribution is  
114 strongly heterogeneous (Olsson, Leirs, & Henttonen, 2010). Different hypotheses have  
115 been sought to explain this discrepancy. First, environmental variables that affect bank  
116 vole population size, e.g. landscape fragmentation or low snow cover, are likely to affect  
117 PUUV epidemiology and prevent PUUV persistence within reservoir host populations.  
118 They may at least partly explain the absence of PUUV in particular geographic areas.  
119 Second, environmental factors may also affect the possibility for PUUV to survive  
120 outside its reservoir host (e.g. low soil humidity or high temperatures, Sauvage, Langlais,  
121 Yoccoz, & Pontier, 2003). However, ecological niche modelling based on these  
122 environmental variables failed to explain accurately the distribution of PUUV in Europe  
123 (Zeimes, Olsson, Ahlm, & Vanwambeke, 2012; Zeimes et al., 2015). An alternative  
124 hypothesis states that spatial variation in the outcomes of *M. glareolus* / PUUV  
125 interactions may affect PUUV replication and excretion in the environment, which could  
126 ultimately shape PUUV distribution and nephropathia epidemica incidence in Europe  
127 (Guivier et al., 2014; Rohfritsch, Guivier, Galan, Chaval, & Charbonnel, 2013). Indeed,  
128 voles differ in their probability of being infected by PUUV (Kallio et al., 2006) and  
129 experimental infections have confirmed that the outcome of PUUV infection could vary  
130 between individuals (Dubois, Castel, et al., 2017; Hardestam et al., 2008). Furthermore,  
131 the genetic background of bank voles contributes to the variation in the response to  
132 infection (Charbonnel et al., 2014). In particular, differences in SNP allele frequencies  
133 within the tumor necrosis factor (*Tnf*) promoter and the *Mx2* gene are likely to influence  
134 PUUV distribution and epidemiology (Guivier et al., 2014; Guivier et al., 2010).

135 So far, the role of immune-related genes on bank vole response to PUUV infection has  
136 only been investigated for a handful of candidate genes (Charbonnel et al., 2014). The

137 recent advent of high-throughput sequencing technologies now offers the opportunity to  
138 test for associations between genetic polymorphisms and susceptibility to infections in  
139 natural populations, at a genome-wide scale. Here, we focus on bank vole populations  
140 from Sweden, a relevant geographic area for the purpose of this study since the  
141 distribution of PUUV is highly heterogeneous throughout the country. Nephropathia  
142 epidemica is endemic in the central and northern parts of the country (Niklasson &  
143 LeDuc, 1987), with about 90% of all human cases in Sweden being found in the four  
144 northernmost counties. In particular, Västerbotten county exhibits the highest  
145 nephropathia epidemica incidence in Sweden, and probably even worldwide (Pettersson,  
146 Boman, Juto, Evander, & Ahlm, 2008). This geographic pattern is not explained by the  
147 reservoir distribution because the bank vole is also common in the South of Sweden  
148 (Hörning et al., 1996). Furthermore, Sweden is characterized by a wide range of climatic  
149 and ecological conditions, which influence the spatial vegetation pattern. In particular,  
150 the landscape forest is divided in several vegetation zones, from the nemoral zone in the  
151 south where broad-leaved deciduous forests dominate, the hemiboreal transition with  
152 mixed deciduous and coniferous forests to the northern wide belt of boreal forests, and  
153 up to the arctic tundra in the north. Finally, there is a contact zone at around 63° N in  
154 Sweden where two subpopulations of *M. glareolus* characterized by differentiated  
155 mitochondrial lineages meet (Nemirov, Leirs, Lundkvist, & Olsson, 2010). It is assumed  
156 that this contact zone was established during the Late Weichselian deglaciation, when  
157 bank voles re-colonized the Scandinavian Peninsula through a first, South-Scandinavian,  
158 migration stream across a pre-historic land bridge from present Denmark, and a second  
159 migration stream from the North-East (Tegelstrom, 1987). It has been shown that the  
160 PUUV strains present in the northern bank vole population are differentiated from those

161 circulating in the southern bank vole populations (Hörning et al., 1996; Johansson et al.,  
162 2008).

163 The main objective of the present study was to characterize genome-wide patterns of  
164 bank vole population differentiation along a North/South transect in Sweden, and to  
165 identify specific genomic regions showing footprints of divergent selection between  
166 PUUV endemic areas in the North and non-endemic areas in the South. To that end, we  
167 used a population genomics approach relying on the sequencing of restriction-site-  
168 associated DNA (RAD-seq, see Baird et al., 2008) of pools of DNA from individuals  
169 sampled in six different localities and that have previously been characterized for a set  
170 of candidate genes (Dubois, Galan, et al., 2017). We combined different model-based  
171 methods of genome-scan, that allowed us to consider several underlying demographic  
172 scenarios, as well as putative associations with environmental variables. Last, we  
173 specifically asked whether immune-related genes were overrepresented among the  
174 genomic regions identified as presumably targeted by selection, as expected under the  
175 hypothesis that bank vole defence strategies against PUUV may have evolved differently  
176 in PUUV endemic and non-endemic areas. Overall, our study provides new insights into  
177 the selective processes that are likely to be involved in *M. glareolus* / PUUV interactions,  
178 and the mechanisms underlying the defence strategies of *M. glareolus* against PUUV  
179 infections. As such, it contributes to a better understanding of the factors driving PUUV  
180 distribution in reservoir populations, which is an important pre-requisite to apprehend  
181 the risk of nephropathia epidemica in Sweden.

182

## 183 **Materials and methods**

### 184 *Sampling*

185 Sampling was performed in April and October 2012. Using snap trapping, a total of 257  
186 bank voles were caught in six localities distributed along a transect running from the  
187 North of Sweden, which is known to be highly endemic for PUUV, to the South of  
188 Sweden, where PUUV is absent in both bank voles and humans (Fig. 1, Table 1).  
189 Collected voles were kept on ice and transferred to -20°C freezers, before being  
190 processed in the laboratory. A piece of hind foot was placed in 95 % ethanol for further  
191 analyses. Permission to trap voles was obtained from the Swedish Environmental  
192 Protection Agency (SEPA; latest permission: Dnr 412-4009-10) and from the Animal  
193 Ethics Committee in Umeå (latest permission: Dnr A-61-11).

194

#### 195 *Molecular markers*

196 Genomic DNA was extracted using the EZ-10 96-well plate genomic DNA isolation Kit for  
197 animal samples (Bio Basic Inc.) following the manufacturer recommendations.

198 *Immune-related candidate genes:* we studied the polymorphism of immune-related  
199 genes that have previously been shown to be associated with PUUV infections (*Tnf*  
200 promoter, *Mx2*, *Tlr4* and *Tlr7* genes, see for a review Charbonnel et al., 2014). The  
201 detection of polymorphisms in *Tnf* promoter was assessed using primers and PCR  
202 conditions derived from Guivier et al. (2010). For all other candidate genes, sequences of  
203 rat and mouse (*Mx2* exons 13 and 14 cDNA, *Tlr4* cDNA, and *Tlr7* cDNA) were retrieved  
204 from the Ensembl website (see Suppl. Mat. Table S1 for accession numbers). Specific  
205 primers were developed for all immune genes in Primer Designer - version 2.0  
206 (Scientific and educational Software Program 1991). Because the exon 3 of *Tlrs* could  
207 not be sequenced at once (2251bp for *Tlr4*, 3149bp for *Tlr7*), we designed two primer  
208 sets to sequence two fragments of about 1000 bp for each *Tlr* (see Suppl. Mat. Table S2

209 for primer sequences). We first assessed polymorphism based on 12 bank voles. PCRs  
210 were performed on an Eppendorf Mastercycler EPgradient S (Hamburg, Germany) in a  
211 25µl volume containing 0.5µl of each primer (10µM), 12.5µl of 2x Qiagen Multiplex PCR  
212 Master Mix, 9µl of ultrapure water and 2.5µl of extracted DNA. The cycling conditions  
213 included an initial denaturation at 95°C (15min) followed by a touchdown on the 10 first  
214 cycles of denaturation at 94°C (20s *Tnf*; 40s *Mx2* and *Tlrs*), annealing at 65–55°C (30s  
215 *Tnf*: 45s *Mx2* and *Tlrs*) with one degree less at each cycle, extension at 72°C (60s *Tnf*,  
216 45s *Mx2*, 90s *Tlrs*), then 30 cycles of denaturation at 94°C (20s *Tnf*; 40s *Mx2* and *Tlrs*),  
217 annealing at 57°C (30s) for *Tnf* or 55°C (45s) for *Mx2* and *Tlrs* and extension at 72°C  
218 (60s *Tnf*, 45s *Mx2*, 90s *Tlrs*), and a final elongation step at 72°C for 10min.

219 The products of all these reactions were electrophoresed on 1.5% agarose gels and  
220 visualized by ethidium bromide staining. PCR products were sequenced in both  
221 directions by Eurofins MWG Operon (Ebersberg, Germany). Sequences were edited and  
222 aligned in BioEdit Sequences Alignment Editor using ClustalW Multiple Alignment (Hall  
223 1999). We next used KASP genotyping services from LGC company (Genotyping by  
224 Allele-Specific Amplification Cuppen 2007) to genotype all sampled voles at SNPs that  
225 were polymorphic in the Swedish samples.

226  
227 *RAD tag sequencing*: we chose to develop high throughput sequencing pools of  
228 individuals to reduce sequencing efforts and costs (Gautier et al., 2013; Schlötterer,  
229 Tobler, Kofler, & Nolte, 2014). Six equimolar pools (from 35 to 37 individuals per  
230 locality) were realized after DNA quality control using Nanodrop, 1,5% agarose gel  
231 electrophoresis and Qubit® 2.0 Fluorometer (Invitrogen) quantification.



232 RAD sequencing was performed following the protocol designed by Etter et al. (2011)  
233 and modified by Cruaud et al. (2014). Briefly, DNA pools were digested with 8-cutter  
234 restriction enzyme *Sbf*I (21 700 sites predicted following the radcounter\_v4.xls  
235 spreadsheet available from the UK RAD Sequencing Wiki  
236 ([www.wiki.ed.ac.uk/display/RADSequencing/Home](http://www.wiki.ed.ac.uk/display/RADSequencing/Home)). For each locality, we built four  
237 independent libraries to avoid methodological biases. Digested DNA pools were ligated  
238 to a modified Illumina P1 adapter containing locality-specific, 5-6 bp long multiplex  
239 identifiers (MIDs). All MIDs differed by at least three nucleotides to limit erroneous  
240 sample assignment due to sequencing error (Suppl Mat Table S3). The 24 libraries were  
241 then pooled and sheared by sonication using S220 ultra-sonicator (Covaris, Inc.).  
242 Genomic libraries were size selected for 300–500 bp by agarose gel excision. P2 adapter  
243 were then ligated and fragments containing both adapters (P1 and P2) were PCR  
244 enriched during 15 cycles. Libraries were sequenced on an Illumina HiSeq 2000  
245 platform (v3 chemistry) using 2x100 bp paired-end sequencing. Illumina sequencing  
246 was performed at the GenePool Genomics Facility (University of Edinburgh, UK).

247 Sequence reads from Illumina runs were demultiplexed and quality filtered using the  
248 *process\_radtags* program from the Stacks package version 0.99994. Ambiguous MIDs  
249 and low quality reads (Phred < 33) were discarded from further analyses. Sequences  
250 were trimmed to 85 nucleotides (position 5 to 90 after the MIDs for the reads 1; position  
251 1 to 85 for the reads 2).

252 Because no reference genome assembly was available for *M. glareolus*, we needed to  
253 build a *de novo* RAD assembly. To that end we first assembled reads 1 per sample with  
254 the *ustacks* program from the Stacks package and default options, except for i) the  
255 minimum depth of coverage required to create a stack (-m option) that was set to 2; ii)

256 the maximum distance in nucleotides allowed between stacks (-M option) that was set  
257 to 3; and iii) the maximum distance allowed to align secondary reads to primary stacks  
258 (-N option) that was set to 2. The resulting set loci were then merged into a catalog of  
259 loci by the *cstacks* program from the Stacks package run with default options except for  
260 the number of mismatches allowed between sample tags to form stacks (-n option) that  
261 was set to 2. For each of the obtained read 1 contigs (i.e., RAD loci), we further  
262 assembled the associated reads 2 using *CAP3* (Hang & Madan, 1999) ran with default  
263 options except for i) the segment pair score cutoff (-i option) that was set to 25; ii) the  
264 overlap length cutoff (-o option) that was set to 25; and iii) the overlap similarity score  
265 cutoff (-s option) that was set to 400. If a single contig was produced after a first *CAP3*  
266 run, this was retained only if it was associated with less than 5% remaining singleton  
267 sequences and supported by more than 40 reads. If several contigs were produced,  
268 *CAP3* was run a second time (using the same options as above) to try to assemble all of  
269 them into a single contig which was in this case retained for further analyses. If read 2  
270 contig overlapped with their corresponding read 1 contig, as assessed with the *blastn*  
271 program from the BLAST+ v2.2.26 suite (e-value<1e-10 and percentage of identity  
272 above 95), both contigs were concatenated. Otherwise, fifteen 'Ns' were inserted  
273 between both contigs.

274 Sequence reads were aligned to this assembly using the programs *aln* and *sampe*  
275 implemented in *bwa* 0.5.9 and ran with default options. The resulting *bam* files were  
276 then jointly analysed with the *mpileup* program from the Samtools v0.1.19 suite. We  
277 used default options except for the minimum mapping quality for alignment (-q option)  
278 that was set to 20. The *mpileup* file was further processed using a custom *awk* script to  
279 perform SNP calling and derive read counts for each alternative base (after discarding

280 bases with a Base Alignment Quality score <25) as previously described (Gautier, 2015;  
281 Gautier et al., 2013}. A position was considered variable if (i) it had a coverage of >5 and  
282 <500 reads in each pool; (ii) only two different bases were observed across all six pools,  
283 and (iii) the minor allele was represented by at least one read in two different pool  
284 samples. Note that triallelic positions for which the two most frequent alleles satisfied  
285 the above criteria with the third allele represented by only one read were included in  
286 the analysis as biallelic SNPs (after filtering the third allele as a sequencing error). To  
287 prevent any convergence issue with the SELESTIM model-based methods for genome  
288 scans that we used (see below), the final dataset was generated by randomizing the  
289 reference allele for each and every locus. These procedures were implemented in R  
290 (Team 2012) using home-made scripts.

291

## 292 *Genetic variation*

293 *Diversity at immune-related candidate genes:* we performed preliminary analyses on the  
294 genotypes inferred at candidate gene SNPs. Observed ( $H_o$ ) and expected ( $H_e$ )  
295 heterozygosities as well as  $F_{IS}$  were estimated using GENEPOP v4.2 (Rousset 2008).  
296 Deviation from Hardy-Weinberg equilibrium was assessed using exact tests  
297 implemented in GENEPOP v4.2. Linkage disequilibrium (LD) was estimated using the  
298 program LINKDOS implemented in GENETIX v4.05 (Belkhir, Borsa, Chikhi, Raufaste, &  
299 Bonhomme, 1996-2004). Significance was assessed using permutation tests.

300

301 *Characterization of population structure:* Population structure analyses were conducted  
302 at the population level. We assessed the pattern of differentiation between the six  
303 populations pairs (and overall) using the  $F_{ST}$  estimator developed by Hivert et al. (in

304 prep., script available upon request) for poolseq data. Next, we estimated the scaled  
305 covariance matrix of population allele frequencies using the algorithm implemented in  
306 BAYPASS (Gautier, 2015). A principal component analysis (PCA) was performed on this  
307 matrix using the FactomineR library in R (Team 2012) to visualize the patterns of  
308 population structure. All SNPs were included, as BAYPASS is likely to be only lightly  
309 sensitive to the inclusion of markers evolving under selection when estimating the  
310 covariance matrix (Lotterhos & Whitlock, 2014). Finally, we tested for an isolation by  
311 distance pattern by analysing the relationship between pairwise genetic distance,  
312 estimated as  $F_{ST} / (1 - F_{ST})$ , and the logarithm of geographical distance using a Mantel  
313 test implemented in R.

314

#### 315 *Detecting putative footprints of selection based on differentiation*

316 We used two different methods to characterize markers showing outstanding  
317 differentiation (as compared to the rest of the genome) between PUUV endemic and  
318 non-endemic areas in Sweden. In these analyses, all candidate loci polymorphisms and  
319 RAD SNPs were included.

320 First, we used the software package SELESTIM 1.1.3 , which is based on a diffusion  
321 approximation for the distribution of allele frequencies in a subdivided population  
322 (island model) that explicitly accounts for selection. In particular, SELESTIM assumes that  
323 each and every locus is targeted by selection to some extent, and estimates the strength  
324 of locus-specific selection for each locus, in each subpopulation. SELESTIM has been  
325 extended since version 1.1.0 to handle Pool-Seq data. Three different SELESTIM analyses  
326 were run to assess convergence. For each analysis, twenty-five short pilot runs (1 000  
327 iterations each) were set to adjust the proposal distributions for each model parameter

328 and, after a 100 000 burn-in period, 100 000 updating steps were performed. Samples  
329 were collected for all the model parameters every 40 steps (thinning interval), yielding 2  
330 500 observations. Convergence was checked using the Gelman–Rubin’s diagnostic  
331 implemented in the CODA package for R (Plummer, Best, Cowles, & Vines, 2006).  
332 Candidate markers under selection were selected on the basis of the distance between  
333 the locus-specific coefficient of selection and a "centering distribution" derived from the  
334 distribution of a genome-wide parameter of selection, which accounts for the variation  
335 among loci of selection strength. SELESTIM uses the Kullback–Leibler divergence (KLD) as  
336 a distance between the two distributions, which is calibrated using simulations from a  
337 predictive distribution based on the observed data (Vitalis, Gautier, Dawson, &  
338 Beaumont, 2014). Hereafter, we report candidate markers with KLD values above the  
339 99.9% quantile of the so-obtained empirical distribution of KLD (although the results  
340 based on the 99.95 and 99.99 % quantiles are also provided).

341 Next, we used the software package BAYPASS (Gautier, 2015), which extends the  
342 approach by Coop et al. (2010) and Günter and Coop (2013). This method relies on the  
343 estimation of the (scaled) covariance matrix of population allele frequencies, which is  
344 known to be informative about demographic history. Therefore, contrary to SELESTIM,  
345 BAYPASS is not limited by the oversimplification of the underlying demographic model.  
346 To identify SNPs targeted by selection, we used BAYPASS to estimate the statistic  $X^TX$ ,  
347 which might be interpreted as a locus-specific analog of  $F_{ST}$ , explicitly corrected for the  
348 scaled covariance of population allele frequencies. To define a significance threshold for  
349 the  $X^TX$  statistic, we used an empirical posterior checking procedure, similar in essence  
350 to the one used in SELESTIM to calibrate the KLD. The posterior predictive distribution of  
351  $X^TX$  was obtained under the null (core) model, by generating and analysing a pseudo-

352 observed dataset (pod) made of 20,000 SNPs (Gautier, 2015). We checked that the  
353 scaled covariance matrix of population allele frequencies estimated from the pod was  
354 close to the matrix estimated from our data (*FMD* distance = 0.088, see (Gautier, 2015)).  
355 The decision criterion for identifying  $X^T X$  outliers was defined from the quantiles of the  
356  $X^T X$  distribution of the pod analysis.

357

### 358 *Detecting putative footprints of selection based on environmental variables*

359 We used BAYPASS to test for associations between allele frequencies and environmental  
360 variables presumably related to PUUV epidemiology, while controlling for demography.  
361 The STD model in BAYPASS assumes a linear effect of the environmental variable on allele  
362 frequencies. We chose empirical Bayesian *P*-values (*eBP*) as the decision criterion,  
363 because it was more stable than Bayes Factors (BF) in the sense that estimates were  
364 highly correlated across multiple independent runs (see also Bourgeois et al., 2017).  
365 Similarly, MCMC sample based estimate of BF (-auxmodel option) or *eBP* (-covmcmc  
366 option) were inaccurate likely due to identifiability issues related to the too small  
367 number of populations considered. Roughly speaking, for a given SNP, the empirical  
368 Bayesian *P*-value measures to which extent the posterior distribution of the regression  
369 coefficient excludes 0 (Gautier, 2015). In order to compute the *eBP*, we used the  
370 importance sampling algorithm implemented in BAYPASS to estimate the moments of the  
371 posterior distribution of the regression coefficients. We calibrated *eBP* using simulations  
372 from a posterior predictive distribution, based on the observed data set.

373 Environmental variables related to PUUV prevalence in human (number of  
374 nephropathia epidemica cases), climate, forest composition and shape, and soil water  
375 content, were selected with regard to PUUV ecology in Europe as they should reflect

376 PUUV distribution in Sweden (Zeimes et al., 2012; Zeimes et al., 2015) (Table 2). Except  
377 for the number of nephropathia epidemica cases that was only available per county,  
378 variables were computed within an area covering a circular radius of 3 km around each  
379 sampling site (ArcGIS 10.1), which is an acceptable estimate of vole dispersal capacity  
380 (Le Galliard, Rémy, Ims, & Lambin, 2012). To summarize climate variation, we used the  
381 minimum temperature in winter (December, January and February), the maximum  
382 temperature in summer (June, July and August), the percentage of the area covered by  
383 snow and the annual precipitation. Land-use was characterized by forest types (the  
384 proportion in the 3km buffer of forest, coniferous, broadleaved and mixed forest) and by  
385 tree species (the volume of spruce and pine and their standard deviation). Forest  
386 patches metrics (computed with FRAGSTATS, version 4,  
387 <http://www.umass.edu/landeco/research/fragstats/fragstats.html>) were averaged in  
388 the 3km buffer and included the contiguity index, the shape index (a shape index of one  
389 represents the most compact shape, upper than one, a more complex shape) and the  
390 perimeter. Finally, the soil water index (SWI) representing the soil moisture conditions  
391 was also included.

392 To reduce the dimensionality of these environmental data, we assessed SNP-  
393 environment associations using the two first principal components (PC) from a PCA that  
394 included all 15 variables (Fig. 2). These new synthetic variables explained respectively  
395 44.1% and 36.6% of the total variance. PC1 represented an environmental, latitudinal  
396 gradient. Along this axis, sampling localities were ranked from northern localities  
397 (positive values) exhibiting high numbers of human PUUV infection and large volume of  
398 spruce forests, to southern localities (negative values) with mixed or broadleaved  
399 forests, low mean winter and high maximum summer temperatures. PC2 strongly

400 opposed the two northern sampling localities, with Hörnefors (negative values) being  
401 characterized by large volume of contiguous coniferous forest and high snow coverage,  
402 and Harnosand (positive values) being more fragmented.

403

404 *Annotations and gene ontology analysis*

405 Annotation of contig sequences: We applied several approaches to functionally annotate  
406 the contigs. First, all consensus sequences (reads1-reads2) were blasted against the  
407 NCBI NT (v. 03/29/2015) and NR (v. 05/16/2015) databases using the blastn (v.  
408 2.2.28+, parameters: threshold e-value of 1e-5, minimum alignment percent identity of  
409 70%) and blastx (e-value of 1e-5) search algorithms, respectively. In-house Perl scripts  
410 were applied to further filter these BLAST results. Only matching sequences of the taxon  
411 '*rodentia*' were considered.

412 In addition, in the absence of a published complete genome of *M. glareolus*, we  
413 compared the RAD contigs to the genome of *Mus musculus* (build GRCm38/mm10). We  
414 downloaded (date: 2015-06-25) the sequences of the 22 mouse chromosomes, 90,891  
415 cDNAs and 87,139 proteins from ENSEMBL (<http://www.ensembl.org/>) and blasted the  
416 RAD contigs against these sequences (blastn for genome and cDNA, blastx for proteins  
417 with same parameters as mentioned above).

418

419 Gene enrichment analysis of outlier candidates: For enrichment analyses of metabolic  
420 pathways and Gene Ontologies (GO), we applied the KOBAS web-application (KOBAS  
421 2.0, <http://kobas.cbi.pku.edu.cn>). For this purpose, we extracted the ENSEMBL gene ids  
422 from the blastx results of the RAD outliers versus the ENSEMBL protein dataset and also  
423 included the gene id of the candidate *Tlr7*. The metabolic pathway databases KEGG,



424 Reactome, BioCyc and PANTHER, as well as the GO database were chosen for the  
425 enrichment analysis. The genome of *Mus musculus* (GRCm38) was chosen as species of  
426 interest. On both ENSEMBL id sets the ‘annotate’ and ‘identify’ programs of KOBAS were  
427 executed with the ENSEMBL ids of the unique set of outliers (all methods combined) as  
428 sample file and the ids of the entire GRCm38 coding gene set as background dataset. For  
429 these analyses, the other parameters of the ‘identify’ program were left on default  
430 settings. Therefore, the enrichment analysis was done using the hypergeometric and  
431 Fisher’s exact tests, and Benjamini and Hochberg’s method was applied for FDR  
432 correction (Benjamini & Hochberg, 1995). A metabolic pathway was considered as  
433 significantly enriched, if the associated  $q$ -value was less than or equal to 0.05. Finally, a  
434 full network representation was provided using the Search Tool for the Retrieval of  
435 Interacting Genes (STRING) database (Snel, Lehmann, Bork, & Huynen, 2000).  
436 Furthermore, we ran the web program REVIGO (web version of 07/27/2015,  
437 <http://revigo.irb.hr/> ; <http://www.ncbi.nlm.nih.gov/pmc/articles/PMC3138752/>) to  
438 group significantly enriched Gene Ontology (GO) terms into GO categories and to  
439 summarise the GO terms to common terms. We applied the SimRel semantic similarity  
440 measure with the default GO term similarity, associated  $q$ -values to the enriched GO  
441 terms, and the *Mus musculus* database (Supek, Bošnjak, Škunca, & Šmuc, 2011).

442

## 443 **Results**

### 444 *RAD tag sequencing*

445 Sequencing of the 24 RAD libraries (6 localities and 4 replicates) generated 340,692,418  
446 reads, with an average of ca. 13.5 million reads per Multiplex Identifiers (MIDs). The  
447 number of sequences generated per locality and MID ranged between ca. 10.1 and ca.

448 15.1 million reads. After trimming sequences to 85 bp and after filtering for quality, an  
449 average of ca. 12.6 million reads per MID (representing 93.5% of the total) were  
450 retained. Read 1 assembling produced 151.522 contigs. The first *CAP3* assembling run of  
451 the associated reads 2 produced 46474 unique contigs represented by more than 40  
452 sequences, and among which 46.471 had less than 5% singleton. The second *CAP3*  
453 assembling run enabled to provide 69.777 read 2 contigs. We found a single significant  
454 alignment between read 1 and read 2 contigs in 59.242 cases and no significant overlap  
455 in 10.495 cases. The other 38 cases corresponded to a complete alignment of read 1  
456 contig with read 2 contig (1 case), an alignment of read 1 contig within read 2 contig (2  
457 cases) and multiple significant alignment (35 cases). The resulting assembly finally  
458 consisted of 69,777 contigs spanning 38.482 Mb (average contig size equal to 551.5,  
459 [209-891]).

460 Reads were aligned to this reference contig dataset and 485,182 SNPs were detected  
461 (QC > 25, depth range: 5-500X). Among them 95,988 SNPs distributed on 70,699 contigs  
462 were kept according to the more stringent criteria described before.

463

#### 464 *Descriptive statistics*

465 *Candidate gene diversity*: The Sanger sequencing of the four immunity-related genes for  
466 12 individuals identified a total of 20 variable sites (19 SNPs and one insertion-deletion  
467 event) from 5395 bp sequence data (Suppl. Mat. Table S4). Each gene had between one  
468 (*Tlr7*) and 14 (*Tlr4*) SNPs. Eight of these SNPs were polymorph in Sweden and were  
469 successfully genotyped in 250 bank voles using the KASP genotyping (Table 3).

470 Not surprisingly, significant linkage disequilibrium (LD) was observed between most  
471 SNPs located within genes: *Tlr4*-exon3 776 and *Tlr4*-exon3 1146, *Tlr4*-exon3 1662,

472 Tlr4-exon3 1687; Tlr4-exon3 1146 and Tlr4-exon3 1662, Tlr4-exon3 1687; Tlr4-exon3  
473 1662 and Tlr4-exon3 1687. We did not detect any linkage disequilibrium among SNPs  
474 located in different genes.

475 Estimates of diversity indices per SNP and per sampling locality can be found in Table  
476 4. Deviation from Hardy-Weinberg equilibrium was observed in most localities for *Tnf*  
477 promoter (-296) with significant deficits in heterozygotes detected in Hörnesand,  
478 Harnefors, Njurunda and Gimo. Moreover, significant departures from Hardy-Weinberg  
479 expectations were observed in Gimo for all polymorphic SNPs in this locality.

480

481 Characterization of population structure: The multilocus  $F_{ST}$  between pairs of populations  
482 ranged from 0.091 to 0.361, and the overall differentiation among populations was  
483 estimated as  $F_{ST} = 0.212$  (Suppl. Mat. Fig. S1). We found a significantly positive  
484 correlation between pairwise genetic distance, estimated as  $F_{ST} / (1 - F_{ST})$ , and the  
485 logarithm of geographical distance (Mantel test;  $p = 0.0014$ ). The PCA performed on the  
486 covariance matrix of population allele frequencies revealed a strong differentiation  
487 between the northern populations Hörnefors (mitochondrial lineage 'Ural'), Härnösand  
488 (mitochondrial lineage 'western') and all other populations on the first axis. The second  
489 axis differentiated the southern population of Gimo from all other populations (Fig. 3a).  
490 The scaled covariance matrix of population allele frequencies estimated with BAYPASS  
491 was also consistent with a strong differentiation between Hörnefors and Härnösand  
492 populations on the one hand, and more southern populations on the other hand (Fig.  
493 3b), as well as with an isolation-by-distance pattern (Fig. 3c).

494

495 *Signatures of selection*

496 SELESTIM: The Gelman–Rubin’s diagnostic was equal to 1.06 for the hyper-parameter  $\lambda$ ,  
497 which represents the genome-wide effect of selection over all demes and loci, and to  
498 1.11 for the parameters  $M$ , which represent the scaled migration parameters. This  
499 indicates that the chains converge satisfactorily to the target distribution. One replicate  
500 analysis was therefore picked at random for the rest of the study. The 99.9% quantile of  
501 the posterior predictive distribution of the KLD (based on pseudo-observed data)  
502 equalled 2.61. We found a total of 86 SNPs, representing 78 unique contigs and the  
503 candidate gene *Tlr7*, with a KLD estimate equal to or larger than this threshold (48 SNPs  
504 were identified as outliers using the 99.95% quantile threshold, and 37 at the 99.99%  
505 threshold). All these outliers showed high  $F_{ST}$  estimates compared with the background  
506  $F_{ST}$  (Fig. 4a). We found a clinal pattern of variation for the locus- and population-specific  
507 coefficients of selection estimated by SELESTIM along the North / South axis of sampling.  
508 Furthermore, we found, for most outliers, that the coefficients of selection were  
509 correlated with the first principal components of the environmental variables that  
510 discriminate areas of high PUUV prevalence in humans from non-endemic PUUV areas  
511 (Fig. 4b).

512  
513 BAYPASS: Considering the core model implemented in BAYPASS (i.e., the covariable-free  
514 approach), we found 10 outlier SNPs, belonging to nine unique contigs ( $X^TX > 14.88$ ,  
515 99.9% quantile). Six SNPs corresponding to five unique contigs were common with the  
516 SELESTIM analysis (Fig. 5a). Considering the 99.95% and the 99.99% quantiles we found  
517 five and one outlier SNP(s), respectively. Out of these, three (respectively zero) were  
518 common with the SELESTIM analysis (Suppl. Mat. Fig. S2).

519 Using the STD model in BAYPASS (which allows the evaluation of associations between  
520 SNP allele frequencies and environmental variables), we found 483 SNPs (belonging to  
521 413 unique contigs) with strong association signals ( $eBP > 15.35$ ). A total of 395 SNPs –  
522 corresponding to 339 unique contigs – showed significant association with the first  
523 principal component of the environmental variables, that discriminate areas of high  
524 PUUV prevalence in humans from non-endemic PUUV areas (Fig. 5b). Among them, 26  
525 contigs were previously detected using SELESTIM only (24 contigs) or SELESTIM and  
526 BAYPASS core model (2 contigs). Ninety SNPs – corresponding to 77 unique contigs –  
527 were associated with the second principal component of the environmental variables  
528 (Fig. 5c). Four of these contigs were previously detected as outliers: three from the  
529 BAYPASS STD model with the first PC, and another one from the SELESTIM analysis. None  
530 of these SNPs were found as outliers in the BAYPASS core model. Results obtained with  
531 other threshold values are provided in Suppl. Mat. Fig. S2.

532

### 533 *Annotation and gene ontology analysis*

534 Annotation of contig sequences: blastn provided an annotation for 49.6% (34,578  
535 contigs) of 69,777 bank vole contigs tested across Rodentia databases; blastx led to an  
536 annotation for 19.8% (13,830 contigs) of them. In total, the BLAST similarity matches  
537 could be assigned to twelve rodent species. The Chinese hamster (37.5%), the house  
538 mouse (27.3%) and the Norway rat (17%) were among the most represented rodents.  
539 When considering the genome sequence of *M. musculus* obtained from ENSEMBL, we  
540 observed that all 22 mouse chromosomes were covered by RAD contigs ( $n = 30,929$ , i.e.,  
541 44.3%). Moreover, about 20% ( $n = 13,856$ ) of the 69,777 bank vole contigs were located  
542 in 6,077 mouse protein-coding genes (cDNAs). Out of these, 9,606 (13.8%) bank vole

543 RAD contigs were actually located in the coding sequence of 4,706 mouse proteins (the  
544 other RAD contigs were more likely located in UTR termini of the cDNA).

545  
546 Annotation, function and gene enrichment analysis of outlier candidate genes: Gene  
547 enrichment analysis was performed on the 468 bank vole outlier contigs detected by at  
548 least one of signature selection methods. Among them, 191 were aligned to the mouse  
549 genome, covering 20 mouse chromosomes. In total, 52 outliers – including the *Tlr7*  
550 candidate gene – matched to 44 mouse protein-coding genes (Table 5). Note that 10 of  
551 these genes were coding for proteins that are involved in immunity (*Dgkd*, *Fermt3*,  
552 *Il12rb1*, *Lbp*, *Lilrb4*, *Nedd4*, *Ptpnc1*, *Tlr7*, *Tnfrsf22*, *Vwa*). They were either detected by the  
553 algorithms of SELESTIM or BAYPASS with environmental associations.

554 The protein-protein interaction network analysis emphasized the importance of  
555 immunity pathways within this set of annotated outliers. It described eight edges  
556 corresponding to associations between five immune related outliers detected in this  
557 study (*Ptpnc1*, *Tlr7*, *Fermt3*, *Dgkd* and *Lilrb4*). The significance of this network  
558 (enrichment *p-value* = 0.001) indicated that the encoded proteins are at least partially  
559 biologically connected (Fig. 6).

560 Using Kegg pathway, Reactome, PANTHER and BioCyc databases for pathway  
561 annotations, we detected 30 pathways with significant enrichment ( $p < 0.05$ , Table 5).  
562 Four of them were linked to TLR pathways, for which we had strong *a priori* reasons to  
563 believe that they were involved in adaptive divergence. Seven other significantly  
564 enriched pathways were directly related to immunity ('Antiviral mechanism by IFN-  
565 stimulated genes'; 'Antigen activates B Cell Receptor'; 'Platelet calcium homeostasis';  
566 'citrulline biosynthesis'; 'ISG15 antiviral mechanism') or indirectly ('Elevation of

567 cytosolic Ca<sup>2+</sup> levels'; 'Choline metabolism in cancer'). Another interesting pathway  
568 with regard to bank vole / PUUV interactions was 'Surfactant metabolism', since some of  
569 the proteins involved in this pathway can interact with pulmonary viral infections. All  
570 outliers involved in these enriched pathways were detected using the STD model in  
571 BAYPASS, except *Tlr7* that was also detected using SELESTIM. Finally, other important  
572 classes of enriched pathway categories were related to metabolism, in particular fatty  
573 acid metabolism, and neurotransmission.

574 Among the gene-associated GO terms, 210 had *p*-values below 0.05. Of these GO  
575 terms, 176 belonged to the GO category Biological process, 21 to Molecular Function and  
576 13 to Cellular Component. REVIGO formed nine clusters for the category Biological  
577 Process (Fig. 7). The most represented cluster was built by the term 'positive regulation  
578 of chemokine production', followed by 'substrate adhesion-dependent cell spreading',  
579 'myeloid leukocyte activation' and 'secretion of lysosomal enzymes'. For the GO category  
580 'Molecular Function' nine GO term clusters were formed among which the most common  
581 terms comprised 'beta-galactoside (CMP) alpha-2,3-sialyltransferase activity', 'Wnt-  
582 activated receptor activity', 'phosphoserine binding' and 'lipoteichoic acid binding'.  
583 Finally, the GO terms 'receptor complex' and 'sarcoplasmic reticulum membrane'  
584 summarised the clusters of the Cellular Component category.

585

## 586 **Discussion**

### 587 *A new toolbox for *Myodes glareolus* studies*

588 Recent years have seen the advent of high throughput sequencing and genotyping  
589 technologies and their application to non-model organisms. It has opened new  
590 perspectives to perform genomic studies and identify genes and networks involved in a

591 diverse array of ecological and evolutionary processes including speciation,  
592 conservation, invasion or biological adaptation (Andrews, Good, Miller, Luikart, &  
593 Hohenlohe, 2016; Ekblom & Galindo, 2011; Narum, Buerkle, Davey, Miller, & Hohenlohe,  
594 2013). In the context of zoonoses, these technologies have mostly been used to study  
595 newly emerging pathogens (Yang, Yang, Zhou, & Zhao, 2008). The analysis of gene  
596 interactions that govern host or reservoir responses to pathogens still remains mostly  
597 restricted to laboratory models and major diseases (e.g. malaria vectors, White et al.,  
598 2011). In this study, we used paired-end RAD sequencing to examine the genomic  
599 patterns of differentiation among six natural populations of *Myodes glareolus*, a rodent  
600 reservoir of *Puumala* virus, the agent of a mild hemorrhagic fever with renal syndrom in  
601 humans. This study complements previous ones that focused on candidate genes  
602 selected from the literature to identify those involved in bank vole susceptibility to  
603 PUUV (Charbonnel et al., 2014). It also provides genomic resources of tens of thousands  
604 RAD-seq markers that will further be available to study genetic diversity, population  
605 structure and adaptation in bank voles. They may be very useful to address different  
606 issues related to this rodent in a wide array of disciplines such as medical science  
607 (Hampton, 2014; Razzauti-Feliu et al., 2015), microbiology (Kohl, Sadowska, Rudolf,  
608 Dearing, & Koteja, 2016), or ecology (Mokkonen et al., 2011).

609

#### 610 *High levels of genetic differentiation between northern and southern bank voles*

611 These genomic data provide population structure patterns that are in agreement with  
612 the previous phylogeographic studies conducted on bank voles based on mitochondrial  
613 sequences and mitogenomes. The stronger level of differentiation was observed  
614 between the northernmost population (Hörnefors) and the southern ones (pairwise  $F_{ST}$



615 comprised between 0.248 and 0.361), in line with a strong pattern of isolation by  
616 distance. This result is also congruent with the macrogeographic pattern classically  
617 observed in Fennoscandia, where two main differentiated mitochondrial lineages are  
618 present respectively in Southern and North-Eastern Sweden (Jaarola, Tegelstrom, &  
619 Fredga, 1999; Tegelstrom & Jaarola, 1998). The recolonization of Fennoscandia, from  
620 separate glacial refugia, after the end of the last glaciation period, shaped this  
621 phylogeographic pattern, with a southern immigration route that became accessible  
622 around 14,1000 BP and a north-eastern one that opened up 10,000 BP (Jaarola et al.,  
623 1999). It created a ca. 50 km-wide secondary contact zone between these two  
624 mitochondrial lineages, which runs from West to East through Central Sweden, between  
625 Hörnefors and Härnösand localities. The genome-wide differentiation observed in this  
626 study reflects this phylogeographic history. This contact zone is also detected for other  
627 mammalian species including the common shrew, the brown bear and the field voles  
628 (Taberlet & Bouvet, 1994). Such suture zone cannot be explained by past or present  
629 natural barriers to dispersal (Jaarola et al., 1999), but rather by a secondary contact  
630 between divergent recolonizing lineages. Secondary contact might result from similar  
631 phylogeographic histories for different mammalian species, or analogous selective  
632 pressures acting on these species. Interestingly, Puumala viruses circulate on both sides  
633 of this contact zone, with distinct genetic variants in the northern and in the southern  
634 bank vole populations, which suggests that a contact zone may also exist between  
635 genetically differentiated PUUV lineages (Hörling et al., 1996).

636

### 637 *Biological limitations*

638

639 Because of the phylogeographical history of *M. glareolus* in Sweden, the transect

640 between the PUUV endemic (Northern Sweden) and non-endemic (Southern Sweden)  
641 areas included a contact zone between two genetically differentiated bank vole lineages.  
642 Our sampling was therefore marked by a strong genetic structure, that coincided  
643 spatially with gradients in ecological variables as well as PUUV distribution.

644 A first consequence is the possibility that  $F_{ST}$  outliers do not result from local  
645 adaptation but from genetic incompatibilities between different backgrounds. Such  
646 endogenous genetic barriers may result in tension zones, whose locations are initially  
647 stochastic but tend to overlap with exogenous ecological barriers (coupling effect, see  
648 Bierne, Welch, Loire, Bonhomme, & David, 2011). It is nearly impossible to disentangle  
649  $F_{ST}$  outliers from genetic incompatibilities in our case, but replicating this work along  
650 other PUUV endemic – non-endemic transects could help identifying loci commonly  
651 evolving in response to PUUV in bank vole populations.

652 A second consequence of this sampling strategy concerns the lack of statistical power  
653 to detect local adaptation while using  $F_{ST}$  outlier statistical methods. These methods are  
654 often based on theoretical assumptions (e.g., populations at equilibrium, island model of  
655 migration) that are rarely completely met in the natural populations sampled. Moreover,  
656 spatial autocorrelations in allele frequencies due to isolation by distance can result in  
657 false correlations between such frequencies and environmental variables (Lotterhos &  
658 Whitlock, 2015; Meirmans, 2012). This potential effect may result in a larger number of  
659 false positive detected with SELESTIM (which assumes an island model of population  
660 structure) as compared to BAYPASS, and a low number of common outliers between  
661 SELESTIM and BAYPASS. This justified the use of genetic-environment associations  
662 statistical methods controlling for population structure (here, BAYPASS). However, this  
663 method may also have low statistical power with our sampling design due to the strong

664 correlation between the axis of population genetic differentiation (North-South isolation  
665 by distance pattern) and the axis of environmental variations (including variations in  
666 PUUV prevalence). Unfortunately, it was not possible to study pairs of nearby  
667 populations, as recommended by Lotterhos et al. (2015), because the limit between  
668 geographic areas where PUUV pressure is high vs. low is barely known. We therefore  
669 had to consider a large sampling scale for bank vole populations, which led to highly  
670 genetically structured samples. Finally, it is likely that little information about  
671 divergence and selection came from the populations sampled in the middle of the  
672 transect, where PUUV pressure as well as environmental and climatic features were  
673 intermediate. Future studies should now focus on samples covering the geographic area  
674 where clines of allele frequencies exhibit slope disruption.

675 Because of these biological limitations, genome scan results have to be considered  
676 cautiously. The combination of three statistical analyses based on population  
677 differentiation and ecological associations to detect outlier loci aimed to reduce the rate  
678 of false positives and to enhance our chances of detecting genuine signatures of  
679 selection (François, Martins, Caye, & Schoville, 2016). The enrichment tests and gene  
680 interaction network analyses may also limit interpretations of false positive outliers.

681

### 682 *Genes involved in selection*

683 We found evidence for a small set of outlier loci (547 SNPs belonging to 468 contigs  
684 among 70,699 examined), showing high levels of genetic differentiation consistent with  
685 divergent selection acting along our North-South transect in Sweden. Because the whole  
686 genome of *Myodes glareolus* is not yet sequenced, assembled and annotated, we met  
687 difficulties in annotating RAD contigs and consequently, outlier ones. Only 41 % of the

688 outlier contigs blasted to genes in the mouse genome. Among them, only 21 % belonged  
689 to protein coding regions and could be annotated. We therefore could only work on a  
690 small part of the information gathered. Moreover we have to remind that this genome  
691 scan approach enabled to screen about 35 Mbp, *i.e.* about 1 % of the genome bank vole.  
692 Altogether, these facts may explain why this population genomic approach could hardly  
693 reveal previously identified candidate genes with regard to bank vole susceptibility to  
694 PUUV (Charbonnel et al., 2014). Despite these limits, we have succeeded in identifying  
695 other genes and pathways probably evolving under differential selection among bank  
696 vole populations from PUUV endemic and non-endemic areas. One third of the enriched  
697 pathways representing SNPs showing these signatures of directional selection  
698 concerned immune processes, with the ‘positive regulation of chemokine production’  
699 being among the most represented biological process. Infectious pathogens are among  
700 the strongest selective forces acting in natural populations, and as such, they contribute  
701 to shape patterns of population divergence and local adaptations in the wild through  
702 balancing and positive selection acting in host genomes (e.g. Fumagalli et al., 2011;  
703 Karlsson et al., 2014; Vatsiou, Bazin, & Gaggiotti, 2016). Many of the immune related  
704 genes showing footprint of positive selection here were detected using ecological  
705 associations with a synthetic variable describing North / South variations in climatic,  
706 forest features and nephropatia epidemica human cases. Although these associations do  
707 not reflect causality, they might be biologically meaningful with regard to environmental  
708 factors and *M. glareolus* microbiome, including PUUV, that influence bank vole responses  
709 to parasitism and genetic polymorphism. Further analyses and experiments are  
710 required to confirm and better interpret this result.

711 More specifically, the analysis of gene interaction network provided support in favor  
712 of this potential local adaptation to environment for molecules involved in platelet  
713 activation (*Fermt3*, *Dgkd*) and TLR pathway (*Tlr7*). The pattern recognition receptors  
714 (PRR) for hantaviruses include Toll-Like receptors, among which TLR7. Its stimulation  
715 activates downstream signalling immune cascades with production of pro-inflammatory  
716 cytokines and IFNs, which are crucial for inducing a variety of innate antiviral effector  
717 mechanisms (Kawai & Akira, 2005). Differential genetic expression of this receptor or  
718 different levels of TLR7-Hantavirus recognition due to TLR7 genetic polymorphism  
719 could affect this activation of immune cascade, with consequences in terms of virus  
720 replication (e.g. for *Tlr7* gene expression between sexes, Klein et al., 2004). Moreover, in  
721 humans, hantavirus-associated syndromes include increased vascular permeability and  
722 platelet dysfunction, with dramatic decreases in platelet counts at the beginning of  
723 vascular leakage (Yanagihara & Silverman, 1990). The presence of functional platelet-  
724 TLR7 and their activation during viral infections could result in this decrease of viral  
725 platelet count, which is likely due to platelet aggregate formation with leukocytes,  
726 followed by internalization in the neutrophil population (Koupenova et al., 2014). In  
727 addition, hantaviruses bind to  $\alpha_{IIb}\beta_3$  integrins expressed on platelets and endothelial  
728 cells, contributing to viral dissemination, platelet activation, and induction of endothelial  
729 cell functions. Gavrilovskaya et al. (2010) suggested that hantavirus associated  
730 pathogenesis could be due to the recruitment of quiescent platelets to the surface of  
731 infected endothelial cells, thereby forming a platelet covering on the surface of the  
732 endothelium. This could dramatically reduce the number of circulating platelets and alter  
733 platelet and endothelial cell interactions, which dynamically regulate vascular integrity. In  
734 reservoirs, hantaviruses persist without exhibiting any sign of immune pathology and

735 they evade immune responses to establish persistence (Easterbrook & Klein, 2008).  
736 Deer mice infected with SNV or ANDV did not show any variations of platelet counts  
737 compared to uninfected one {Schountz, 2012 #1409}. Our results might therefore  
738 suggest that genetic polymorphisms associated with *Tlr7* or platelet activation genes  
739 may account for differences in the immune responses to PUUV infections, and the  
740 possibility for this virus to persist in *M. glareolus*. These polymorphisms could  
741 contribute to shape the contrasted PUUV epidemiological situations observed in natural  
742 populations of bank voles from Northern and Southern Sweden.

743 In addition, several genes encoding molecules with functions in metabolic processes  
744 related to glycolysis / gluconeogenesis, lipid metabolism and citric acid cycles, showed  
745 signatures of selection that were mainly detected from ecological associations with the  
746 synthetic variable describing North / South variations in Sweden. Previous studies  
747 have demonstrated that energy metabolism shows important inter- and intraspecific  
748 variations in endotherms driven by physiological, ecological and evolutionary factors  
749 (Boratynski et al., 2011). It is likely that the rate of metabolism is correlated with life  
750 history traits and fitness components , although different correlations can be observed  
751 due to fluctuating selection between seasons (Nilsson & Nilsson, 2016). We can  
752 therefore speculate that polymorphism at these genes (*Acsbg1*, *Atp4a*, *Chpt1*, *Eno1*,  
753 *Hmgn2*, *Itpr2*, *Nuak2*, *Ocrl*, *Prodh2*, *St3gal2*, *Zfp113*, see Table 5) might contribute to  
754 bank vole local adaptation to climatic and ecological conditions along a North / South  
755 transect across Sweden. Previous studies based on globin genes in bank voles from  
756 Britain found similar patterns of genetic divergence between northern and southern  
757 populations, mediated by natural selection through the evolution of bank vole  
758 erythrocyte resistance to oxidative stress (Kotlik et al., 2006).

759

760 *Methodological considerations*

761 RAD-seq has become an increasingly common genome scan approach this last decade,  
762 although several difficulties regarding the identification of genes of functional  
763 significance with regard to population divergence and local adaptations have been  
764 pointed out (Lowry et al., 2017). Some of these potential limitations are discussed  
765 below.

766 First, we chose to develop a RAD-seq approach based on the pooling of samples  
767 without individual barcoding, so that we could estimate population allele frequencies at  
768 an affordable cost. Nevertheless, there are several limitations to pooling strategies  
769 (Gautier et al., 2013; Narum et al., 2013). Uneven sequencing of individuals in pools may  
770 lead to biases in allele frequency estimates. As recommended in Andrews et al. (2016) or  
771 Guo et al. (2016), we minimized this bias by including large sample size per pool and  
772 replicating libraries for each population. Another possible shortcoming of pooling is that  
773 cryptic population structure cannot be identified and taken into account in the case  
774 where multiple independent groups of individuals are mixed within a single pool. This  
775 possibility was minimized by sampling bank voles in a limited geographic area for each  
776 population, although we cannot discard the possibility of intra-population structuring,  
777 which is frequent in rodents.

778 Second, we are aware that the RAD-seq approach enabled to sample only a small  
779 proportion of *M. glareolus* genome so that we might have missed potentially important  
780 adaptive SNPs (Lowry et al., 2017). This limitation was reinforced by the lack of genomic  
781 resources for bank voles, that prevent us from identifying a large part of outlier SNPs.  
782 Nevertheless, we think that RAD-seq was the most appropriate approach for bank vole

783 population genomics considering the large genome size of this species, the absence of  
784 genome reference and the number of individuals and populations we had to screen  
785 (McKinney, Larson, Seeb, & Seeb, 2016).

786

## 787 *Conclusions*

788 Using a pool RAD-seq approach and a combination of statistical methods to detect loci  
789 with high genetic differentiation and associations with environmental variables of  
790 interests, we have identified a list of putative loci that are worthy for further  
791 experimental and functional studies to better understand *Myodes glareolus* / PUUV  
792 interactions, and potentially NE epidemiology. These results are of main importance  
793 because our previous knowledge of the factors driving immuno-heterogeneity among  
794 reservoirs of hantaviruses was inferred from the medical literature or from results  
795 based on laboratory models. In the future, they could enable to better assess the risk of  
796 NE emergence by including reservoir immunogenetics in ecological niche modelling.  
797 They could also have important implications for medical purposes, by revealing  
798 potential immune and metabolic pathways driving hantavirus pathogenesis in humans  
799 and non-reservoirs.

800

## 801 **Acknowledgments**

802 The authors wish to thank H el ene Holota from TAGC facility for the Covaris sonication of  
803 the RAD libraries. Data used in this work were partly produced through the genotyping  
804 and sequencing facilities of ISEM (Institut des Sciences de l'Evolution-Montpellier) and  
805 Labex Centre M editerran een Environnement Biodiversit e. This article is registered with  
806 the EDENext Steering Committee as EDENext406 (<http://www.edenext.eu/>).



807

808 **References**

809 Andrews, K. R., Good, J. M., Miller, M. R., Luikart, G., & Hohenlohe, P. A. (2016).

810 Harnessing the power of RADseq for ecological and evolutionary genomics.

811 *Nature Reviews Genetics*, 17, 81-92. doi:10.1038/nrg.2015.28

812 Baird, N. A., Etter, P. D., Atwood, T. S., Currey, M. C., Shiver, A. L., Lewis, Z. A., . . . Johnson,

813 E. A. (2008). Rapid SNP discovery and genetic mapping using sequenced RAD

814 markers. *Plos One*, 3. doi:10.1371/journal.pone.0003376

815 Barreiro, L. B., & Quintana-Murci, L. (2010). From evolutionary genetics to human

816 immunology: how selection shapes host defence genes. *Nature Reviews Genetics*,

817 11, 17-30. doi:10.1038/nrg2698

818 Belkhir, K., Borsa, P., Chikhi, L., Raufaste, N., & Bonhomme, F. (1996-2004). GENETIX

819 4.05, logiciel sous Windows TM pour la génétique des populations. Montpellier

820 (France): Laboratoire Génome, Populations, Interactions, CNRS UMR 5171,

821 Université de Montpellier II.

822 Benjamini, Y., & Hochberg, Y. (1995). Controlling the false discovery rate: a practical and

823 powerful approach to multiple testing. *Journal of the Royal Statistical Society:*

824 *Series B*, 57, 289-300. doi:10.2307/2346101

825 Bierne, N., Welch, J., Loire, E., Bonhomme, F., & David, P. (2011). The coupling

826 hypothesis: why genome scans may fail to map local adaptation genes. *Molecular*

827 *Ecology*, 20, 2044-2072. doi:10.1111/j.1365-294X.2011.05080.x

828 Boratynski, Z., Alves, P. C., Berto, S., Koskela, E., Mappes, T., & Melo-Ferreira, J. (2011).

829 Introgression of mitochondrial DNA among *Myodes* voles: consequences for

830 energetics? *Bmc Evolutionary Biology*, 11. doi:10.1186/1471-2148-11-355

- 831 Bourgeois, Y. X. C., Delahaie, B., Gautier, M., Lhuillier, E., Male, P. J. G., Bertrand, J. A. M., . . .  
832 Thebaud, C. (2017). A novel locus on chromosome 1 underlies the evolution of a  
833 melanic plumage polymorphism in a wild songbird. *Royal Society Open Science*, *4*.  
834 doi:10.1098/rsos.160805
- 835 Brummer-Korvenkoti, M., Henttonen, H., & Vaheri, A. (1982). Hemorrhagic fever with  
836 renal syndrome in Finland: Ecology and virology of Nephropathia Epidemica.  
837 *Scandinavian Journal of Infectious Diseases*, *36*, 88-89.
- 838 Charbonnel, N., & Cosson, J. F. (2011). Molecular epidemiology of disease resistance  
839 genes with perspectives for researches on biological invasions and hybrid zones.  
840 In S. Morand, F. Beaudou, J. Cabaret, & J. de Rycke (Eds.), *New frontiers of*  
841 *Molecular Epidemiology of Infectious Diseases*: Springer.
- 842 Charbonnel, N., Pagès, M., Sironen, T., Henttonen, H., Vapalahti, O., Mustonen, J., & Vaheri,  
843 A. (2014). Immunogenetic factors affecting susceptibility of humans and rodents  
844 to hantaviruses and the clinical course of hantaviral disease in humans. *Viruses*, *6*,  
845 2214-2241. doi:10.3390/v6052214
- 846 Coop, G., Witonsky, D., Di Rienzo, A., & Pritchard, J. K. (2010). Using environmental  
847 correlations to identify loci underlying local adaptation. *Genetics*, *185*, 1411-1423.  
848 doi:10.1534/genetics.110.114819
- 849 Cruaud, A., Gautier, M., Galan, M., Foucaud, J., Saune, L., Genson, G., . . . Rasplus, J. Y.  
850 (2014). Empirical assessment of RAD sequencing for interspecific phylogeny.  
851 *Molecular Biology and Evolution*, *31*, 1272-1274. doi:10.1093/molbev/msu063
- 852 Dubois, A., Castel, G., Murri, S., Pulido, C., Pons, J. B., Benoit, L., . . . Marianneau, P. (2017).  
853 Experimental infections of wild bank voles (*Myodes glareolus*) from Nephropatia  
854 Epidemica endemic and non-endemic regions revealed slight differences in

- 855 Puumala virological course and immunological responses. *Virus Research*, 235,  
856 67-72. doi:10.1016/j.virusres.2017.04.004
- 857 Dubois, A., Galan, M., Guivier, E., Henttonen, H., Voutilainen, L., Razzauti, M., . . .  
858 Charbonnel, N. (2017). Microevolution of bank voles (*Myodes glareolus*) at  
859 neutral and immune related genes during a multi-annual complete dynamic cycle  
860 : consequences for Puumala hantavirus epidemiology. *Infection Genetics  
861 Evolution*, 49, 318–329. doi:10.1016/j.meegid.2016.12.007
- 862 Easterbrook, J. D., & Klein, S. L. (2008). Immunological mechanisms mediating  
863 hantavirus persistence in rodent reservoirs. *Plos Pathogens*, 4.  
864 doi:10.1371/journal.ppat.1000172
- 865 Ekblom, R., & Galindo, J. (2011). Applications of next generation sequencing in molecular  
866 ecology of non-model organisms. *Heredity*, 107, 1-15. doi:10.1038/hdy.2010.152
- 867 Etter, P. D., Preston, J. L., Bassham, S., Cresko, W. A., & Johnson, E. A. (2011). Local de  
868 novo assembly of RAD paired-end contigs using short sequencing reads. *Plos One*,  
869 6, e18561. doi:10.1371/journal.pone.0018561
- 870 François, O., Martins, H., Caye, K., & Schoville, S. D. (2016). Controlling false discoveries  
871 in genome scans for selection. *Molecular Ecology*, 25, 454–469.  
872 doi:10.1111/mec.13513
- 873 Fumagalli, M., Sironi, M., Pozzoli, U., Ferrer-Admetlla, A., Pattini, L., & Nielsen, R. (2011).  
874 Signatures of environmental genetic adaptation pinpoint pathogens as the main  
875 selective pressure through human evolution. *PLos Genetics*, 7, e1002355.  
876 doi:10.1371/journal.pgen.1002355

- 877 Gautier, M. (2015). Genome-wide scan for adaptive divergence and association with  
878 population-specific covariates. *Genetics*, *201*, 1555-1579.  
879 doi:10.1534/genetics.115.181453
- 880 Gautier, M., Foucaud, J., Gharbi, K., Cezard, T., Galan, M., Loiseau, A., . . . Estoup, A. (2013).  
881 Estimation of population allele frequencies from next-generation sequencing  
882 data: pool-versus individual-based genotyping. *Molecular Ecology*, *22*, 3766-3779.  
883 doi:10.1111/mec.12360
- 884 Gavrilovskaya, I. N., Gorbunova, E. E., & Mackow, E. R. (2010). Pathogenic hantaviruses  
885 direct the adherence of quiescent platelets to infected endothelial cells. *Journal of*  
886 *virology*, *84*. doi:10.1128/JVI.02405-09
- 887 Guivier, E., Galan, M., Henttonen, H., Cosson, J. F., & Charbonnel, N. (2014). Landscape  
888 features and helminth co-infection shape bank vole immunoheterogeneity, with  
889 consequences for Puumala virus epidemiology. *Heredity*, *112*, 274-281.  
890 doi:10.1038/hdy.2013.103
- 891 Guivier, E., Galan, M., Ribas Salvador, A., Xuéreb, A., Chaval, Y., Olsson, G., . . . Charbonnel,  
892 N. (2010). *Tnf- $\alpha$*  expression and promoter sequences reflect the balance of  
893 tolerance/resistance to *Puumala virus* infection in European bank vole  
894 populations. *Infection Genetics Evolution*, *10*, 1208-1217.  
895 doi:10.1016/j.meegid.2010.07.022
- 896 Gunther, T., & Coop, G. (2013). Robust identification of local adaptation from allele  
897 frequencies. *Genetics*, *195*, 205-220. doi:10.1534/genetics.113.152462
- 898 Guo, B. C., Li, Z. T., & Merila, J. (2016). Population genomic evidence for adaptive  
899 differentiation in the Baltic Sea herring. *Molecular Ecology*, *25*, 2833-2852.  
900 doi:10.1111/mec.13657

- 901 Hampton, T. (2014). Bank vole a novel model of prion transmission. *Jama-Journal of the*  
902 *American Medical Association*, 311, 1722-1722. doi:10.1001/jama.2014.4334
- 903 Hang, X., & Madan, A. (1999). CAP3: A DNA sequence assembly program. *Genome*  
904 *Research*, 9, 868-877. doi:10.1101/gr.9.9.868
- 905 Hardestam, J., Karlsson, M., Falk, K. I., Olsson, G., Klingström, J., & Lundkvist, A. (2008).  
906 Puumala hantavirus excretion kinetics in bank voles (*Myodes glareolus*).  
907 *Emerging Infectious Diseases*, 14, 1209-1215. doi:10.3201/eid1408.080221
- 908 Hill, A. V., Allsopp, C. E., Kwiatkowski, D., Anstey, N. M., Twumasi, P., Rowe, P. A., . . .  
909 Greenwood, B. M. (1994). Common west African HLA antigens are associated  
910 with protection from severe malaria. *Nature*, 352, 595-600.  
911 doi:10.1038/352595a0
- 912 Hörling, J., Lundkvist, A., Jaarola, M., Plyusnin, A., Tegelström, H., Persson, K., . . .  
913 Niklasson, B. (1996). Distribution and genetic heterogeneity of Puumala virus in  
914 Sweden. *Journal of General Virology*, 77, 2555-2562. doi:10.1099/0022-1317-77-  
915 10-2555
- 916 Jaarola, M., Tegelstrom, H., & Fredga, K. (1999). Colonization history in Fennoscandian  
917 rodents. *Biological journal of the Linnean society*, 68, 113-127.  
918 doi:10.1111/j.1095-8312.1999.tb01161.x
- 919 Johansson, P., Olsson, G. E., Low, H. T., Bucht, G., Ahlm, C., Juto, P., & Elgh, F. (2008).  
920 Puumala hantavirus genetic variability in an endemic region (Northern Sweden).  
921 *Infection Genetics and Evolution*, 8, 286-296. doi:10.1016/j.meegid.2008.01.003
- 922 Kallio, E. R., Klingström, J., Gustafsson, E., Manni, T., Vaheri, A., Henttonen, H., . . .  
923 Lundkvist, A. (2006). Prolonged survival of Puumala hantavirus outside the host:

- 924 evidence for indirect transmission via the environment. *Journal of General*  
925 *Virology*, 87, 2127-2134. doi:10.1099/vir.0.81643-0
- 926 Karlsson, E. K., Kwiatkowski, D. P., & Sabeti, P. C. (2014). Natural selection and infectious  
927 disease in human populations. *Nature Reviews Genetics*, 15, 379-393.  
928 doi:10.1038/nrg3734
- 929 Kawai, T., & Akira, S. (2005). Pathogen recognition with Toll-like receptors. *Current*  
930 *Opinion in Immunology*, 17, 338-344. doi:10.1016/j.coi.2005.02.007
- 931 Klein, S. L., Cernetich, A., Hilmer, S., Hoffman, E. P., Scott, A. L., & Glass, G. E. (2004).  
932 Differential expression of immunoregulatory genes in male and female Norway  
933 rats following infection with Seoul virus. *Journal of Medical Virology*, 74, 180-190.  
934 doi:10.1002/jmv.20163
- 935 Kohl, K. D., Sadowska, E. T., Rudolf, A. M., Dearing, M. D., & Koteja, P. (2016).  
936 Experimental Evolution on a Wild Mammal Species Results in Modifications of  
937 Gut Microbial Communities. *Frontiers in Microbiology*, 7.  
938 doi:10.3389/fmicb.7016.00634
- 939 Kotlik, P., Deffontaine, V., Mascheretti, S., Zima, J., Michaux, J. R., & Searle, J. B. (2006). A  
940 northern glacial refugium for bank voles (*Clethrionomys glareolus*). *Proceedings of*  
941 *the National Academy of Sciences USA*, 103, 14860-14864. doi:  
942 10.1073/pnas.0603237103
- 943 Koupenova, M., Vitseva, O., MacKay, C. R., Beaulieu, L. M., Benjamin, E. J., Mick, E., . . .  
944 Freedman, J. E. (2014). Platelet-TLR7 mediates host survival and platelet count  
945 during viral infection in the absence of platelet-dependent thrombosis. *Blood*,  
946 124, 791-802. doi:10.1182/blood-2013-11-536003

- 947 Le Galliard, J. F., Rémy, A., Ims, R. A., & Lambin, X. (2012). Patterns and processes of  
948 dispersal behaviour in arvicoline rodents. *Molecular Ecology*, *21*, 505-523.  
949 doi:10.1111/j.1365-294X.2011.05410.x
- 950 Lotterhos, K. E., & Whitlock, M. C. (2014). Evaluation of demographic history and neutral  
951 parameterization on the performance of FST outlier tests. *Molecular Ecology*, *23*,  
952 2178-2192. doi:10.1111/mec.12725
- 953 Lotterhos, K. E., & Whitlock, M. C. (2015). The relative power of genome scans to detect  
954 local adaptation depends on sampling design and statistical method. *Molecular  
955 Ecology*, *24*, 1031-1046. doi:10.1111/mec.13100
- 956 Lowry, D. B., Hoban, S., Kelley, J. L., Lotterhos, K. E., Reed, L. K., Antolin, M. F., & Storfer, A.  
957 (2017). Breaking RAD: an evaluation of the utility of restriction site-associated  
958 DNA sequencing for genome scans of adaptation. *Molecular Ecology Resources*, *17*,  
959 142-152. doi:10.1111/1755-0998.12635
- 960 McKinney, G. J., Larson, W. A., Seeb, L. W., & Seeb, J. E. (2016). RADseq provides  
961 unprecedented insights into molecular ecology and evolutionary genetics:  
962 comment on Breaking RAD by Lowry et al. (2016). *Molecular Ecology Resources*.  
963 doi:10.1111/1755-0998.12649
- 964 Meirmans, P. G. (2012). The trouble with isolation by distance. *Molecular Ecology*, *21*,  
965 2839-2846. doi:10.1111/j.1365-294X.2012.05578.x
- 966 Mokkonen, M., Kokko, H., Koskela, E., Lehtonen, J., Mappes, T., Martiskainen, H., & Mills, S.  
967 C. (2011). Negative frequency-dependent selection of sexually antagonistic alleles  
968 in *Myodes glareolus*. *Science*, *334*, 972-974. doi:10.1126/science.1208708

- 969 Narum, S. R., Buerkle, C. A., Davey, J. W., Miller, M. R., & Hohenlohe, P. A. (2013).  
970 Genotyping-by-sequencing in ecological and conservation genomics. *Molecular*  
971 *Ecology*, *22*, 2841-2847. doi:10.1111/mec.12350
- 972 Nemirov, K., Leirs, H., Lundkvist, A., & Olsson, G. E. (2010). Puumala hantavirus and  
973 *Myodes glareolus* in northern Europe: no evidence of co-divergence between  
974 genetic lineages of virus and host. *Journal of General Virology*, *91*, 1262-1274.  
975 doi:10.1099/vir.0.016618-0
- 976 Niklasson, B., & LeDuc, J. (1987). Epidemiology of nephropathia epidemica in Sweden.  
977 *Journal of Infectious Diseases*, *155*, 269-276. doi:10.1093/infdis/155.2.269
- 978 Nilsson, J. F., & Nilsson, J. A. (2016). Fluctuating selection on basal metabolic rate.  
979 *Ecology and evolution*, *6*, 1197-1202. doi:10.1002/ece3.1954
- 980 Olsson, G. E., Leirs, H., & Henttonen, H. (2010). Hantaviruses and their hosts in Europe:  
981 Reservoirs here and there, but not everywhere? *Vector-Borne and Zoonotic*  
982 *Diseases*, *10*, 549-561. doi:10.1089/vbz.2009.0138
- 983 Petterson, L., Boman, J., Juto, P., Evander, M., & Ahlm, C. (2008). Outbreak of Puumala  
984 virus infection, Sweden. *Emerging Infectious Diseases*, *14*, 808-810.  
985 doi:10.3201/eid1405.071124
- 986 Plummer, M., Best, N., Cowles, K., & Vines, K. (2006). CODA: Convergence diagnosis and  
987 output analysis for MCMC. *R News*, *6*, 7-11.
- 988 Quintana-Murci, L., & Clark, A. G. (2013). Population genetic tools for dissecting innate  
989 immunity in humans. *Nature Reviews Immunology*, *13*, 280-293.  
990 doi:10.1038/nri3421
- 991 Razzauti-Feliu, M., Galan, M., Bernard, M., Maman, S., Klopp, C., Charbonnel, N., . . .  
992 Cosson, J. F. (2015). Comparison of next-generation sequencing approaches



- 993 surveying bacterial pathogens in wildlife. *Plos Neglected Tropical Diseases*, 9,  
994 e0003929. doi:10.1371/journal.pntd.0003929
- 995 Rohfritsch, A., Guivier, E., Galan, M., Chaval, Y., & Charbonnel, N. (2013). Apport de  
996 l'immunogénétique à la compréhension des interactions entre le campagnol  
997 roussâtre *Myodes glareolus* et l'hantavirus Puumala. *Bulletin de l'académie*  
998 *vétérinaire de France*, 166, 165-176. doi:10.4267/2042/51622
- 999 Sauvage, F., Langlais, M., Yoccoz, N. G., & Pontier, D. (2003). Modelling hantavirus in  
1000 fluctuating populations of bank voles: the role of indirect transmission on virus  
1001 persistence. *Journal of Animal Ecology*, 72, 1-13. doi:10.1046/j.1365-  
1002 2656.2003.00675.x
- 1003 Schlötterer, C., Tobler, R., Kofler, R., & Nolte, V. (2014). Sequencing pools of individuals  
1004 — mining genome-wide polymorphism data without big funding. *Nature Review*  
1005 *Genetics*, 15, 749–763. doi:10.1038/nrg3803
- 1006 Schmid-Hempel, P. (2003). Variation in immune defence as a question of evolutionary  
1007 ecology. *Proceedings of the Royal Society of London, B*, 270, 357-366.  
1008 doi:10.1098/rspb.2002.2265
- 1009 Schulenburg, H., Kurtz, J., Moret, Y., & Siva-Jothy, M. T. (2009). Introduction. Ecological  
1010 immunology. *Philosophical transactions of the Royal Society of London, B*, 364, 3-  
1011 14. doi:10.1098/rstb.2008.0249
- 1012 Sheldon, B. C., & Verhulst, S. (1996). Ecological immunology: costly parasite defences  
1013 and trade-offs in evolutionary ecology. *Trends in Ecology and Evolution*, 11, 317-  
1014 321. doi:10.1016/0169-5347(96)10039-2

- 1015 Snel, B., Lehmann, G., Bork, P., & Huynen, M. A. (2000). STRING: a web-server to retrieve  
1016 and display the repeatedly occurring neighbourhood of a gene. *Nucleic Acids*  
1017 *Research*, 28, 3442-3444. doi:10.1093/nar/28.18.3442
- 1018 Stenseth, N. C. (1985). Geographic distribution of *Chletrionomys* species. *Annales*  
1019 *Zoologici Fennici*, 22, 215-219.
- 1020 Supek, F., Bošnjak, M., Škunca, N., & Šmuc, T. (2011). REVIGO summarizes and visualizes  
1021 long lists of gene ontology terms. *Plos One*, 6, e21800.  
1022 doi:10.1371/journal.pone.0021800
- 1023 Taberlet, P., & Bouvet, J. (1994). Mitochondrial DNA polymorphism, phylogeography,  
1024 and conservation genetics of the brown bear *Ursus arctos* in Europe. *Proceeding*  
1025 *of the Royal Society of London serie B*, 255, 195-200. doi:10.1098/rspb.1994.0028
- 1026 Tegelstrom, H. (1987). Transfer of mitochondrial DNA from the northern red-backed  
1027 vole (*Clethrionomys rutilus*) to the bank vole (*C. glareolus*). *Journal of Molecular*  
1028 *Evolution*, 24, 218-227. doi:10.1007/BF02111235
- 1029 Tegelstrom, H., & Jaarola, M. (1998). Geographic localization of a contact zone between  
1030 bank voles *Clethrionomys glareolus* with distinctly different mitochondrial DNA.  
1031 *Acta Theriologica*, 43, 175-183. doi:10.4098/AT.arch.98-13
- 1032 Vatsiou, A. I., Bazin, E., & Gaggiotti, O. E. (2016). Changes in selective pressures  
1033 associated with human population expansion may explain metabolic and immune  
1034 related pathways enriched for signatures of positive selection. *BMC Genomics*, 17,  
1035 11. doi:10.1186/s12864-016-2783-2
- 1036 Vitalis, R., Gautier, M., Dawson, K. J., & Beaumont, M. A. (2014). Detecting and measuring  
1037 selection from gene frequency data. *Genetics*, 196, 799-817.  
1038 doi:10.1534/genetics.113.152991

- 1039 Wenzel, M. A., Douglas, A., James, M. C., Redpath, S. M., & Piertney, S. B. (2016). The role  
1040 of parasite-driven selection in shaping landscape genomic structure in red grouse  
1041 (*Lagopus lagopus scotica*). *Molecular Ecology*, *25*, 324-341.  
1042 doi:10.1111/mec.13473
- 1043 White, B. J., Lawniczak, M. K. N., Cheng, C. D., Coulibaly, M. B., Wilson, M. D., Sagnon, N., . . .  
1044 Besansky, N. J. (2011). Adaptive divergence between incipient species of  
1045 *Anopheles gambiae* increases resistance to Plasmodium. *Proceedings of the*  
1046 *National Academy of Sciences of the United States of America*, *108*, 244-249.  
1047 doi:10.1073/pnas.1013648108
- 1048 Yanagihara, R., & Silverman, D. J. (1990). Experimental infection of human vascular  
1049 endothelial cells by pathogenic and non pathogenic hantaviruses *Archives of*  
1050 *Virology*, *111*, 281-286. doi:10.1007/bf01311063
- 1051 Yang, X. N., Yang, H. L., Zhou, G. Q., & Zhao, G. P. (2008). Infectious disease in the genomic  
1052 era. In *Annual Review of Genomics and Human Genetics* (Vol. 9, pp. 21-48). Palo  
1053 Alto: Annual Reviews.
- 1054 Zeimes, C. B., Olsson, G. E., Ahlm, C., & Vanwambeke, S. O. (2012). Modelling zoonotic  
1055 diseases in humans: comparison of methods for hantavirus in Sweden.  
1056 *International Journal of Health Geographics*, *11*. doi:10.1186/1476-072x-11-39
- 1057 Zeimes, C. B., Quoilin, S., Henttonen, H., Lyytikäinen, O., Vapalahti, O., Reynes, J. M., . . .  
1058 Vanwambeke, S. O. (2015). Landscape and regional environmental analysis of the  
1059 spatial distribution of hantavirus human cases in Europe. *Frontiers in Public*  
1060 *Health*, *3*, 1-10. doi:10.3389/fpubh.2015.00054

1061

1062 **Data accessibility**

1063 DNA sequences of candidate genes are accessible in Genbank (see accession numbers in  
1064 Table 3).

1065 Illumina RAD-tag sequences will be accessible in dryad digital depository.

1066 Our final SNP data set is available as a supplementary file.

1067

1068 **Author contribution**

1069 A.R., M.Gal. and N.C. designed the research. G. O. performed field sampling. A.R., M.Gal.

1070 and K.G. performed the laboratory work. N.C., A.R., B.G., R.V. and M.Gau. helped with

1071 bioinformatics and statistical analyses, C.Z. and S.VW provided the environmental data.

1072 N.C. wrote the first draft of the manuscript, and all authors contributed substantially to

1073 revisions.

1074

1 **Fig. 1** Maps showing the localities of bank vole sampling in Sweden. The red lines delimit the  
2 counties with 90% of human hantavirus cases reported. Geographic variations in ecoregions  
3 are represented with yellow, orange and green colors. The contact zone between the two  
4 mitochondrial lineages of *M. glareolus* is indicated with a black line.  
5

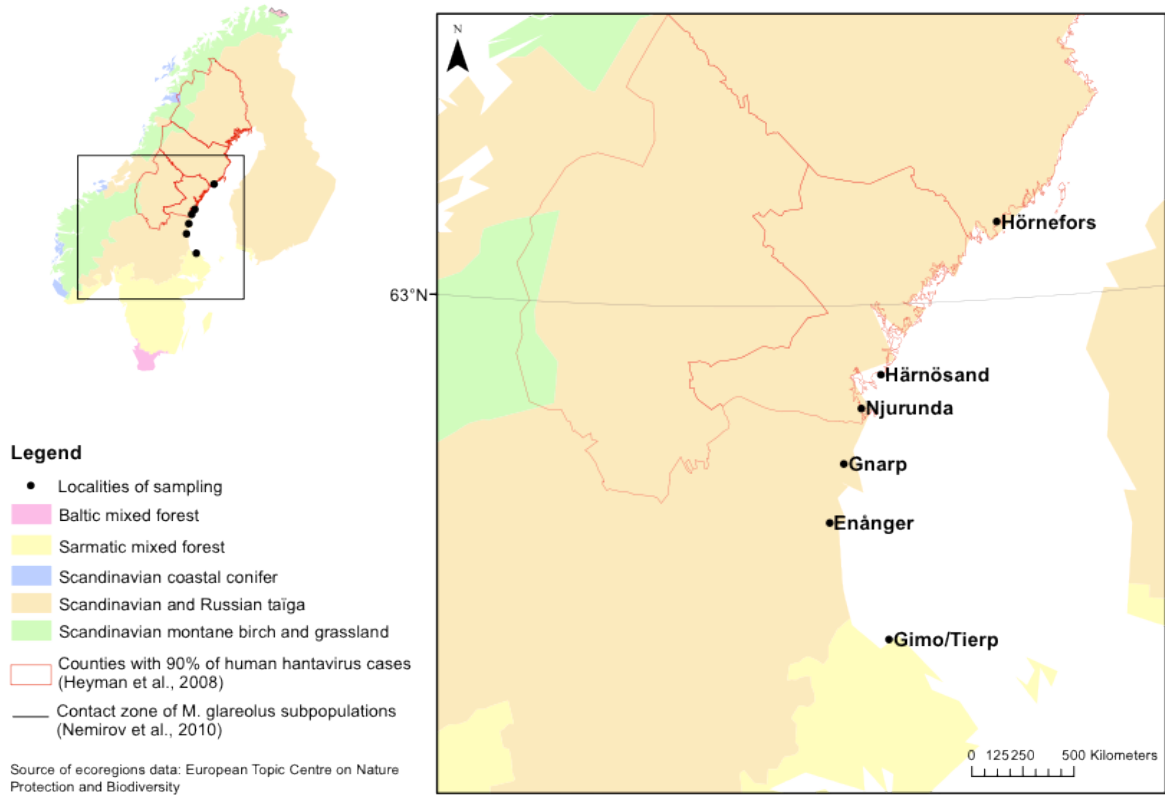

6  
7

8 **Fig. 2** Principal Component Analysis (PCA) plot of the environmental data and of the six  
9 populations analysed. Details about environmental variables are provided in Table 2.  
10

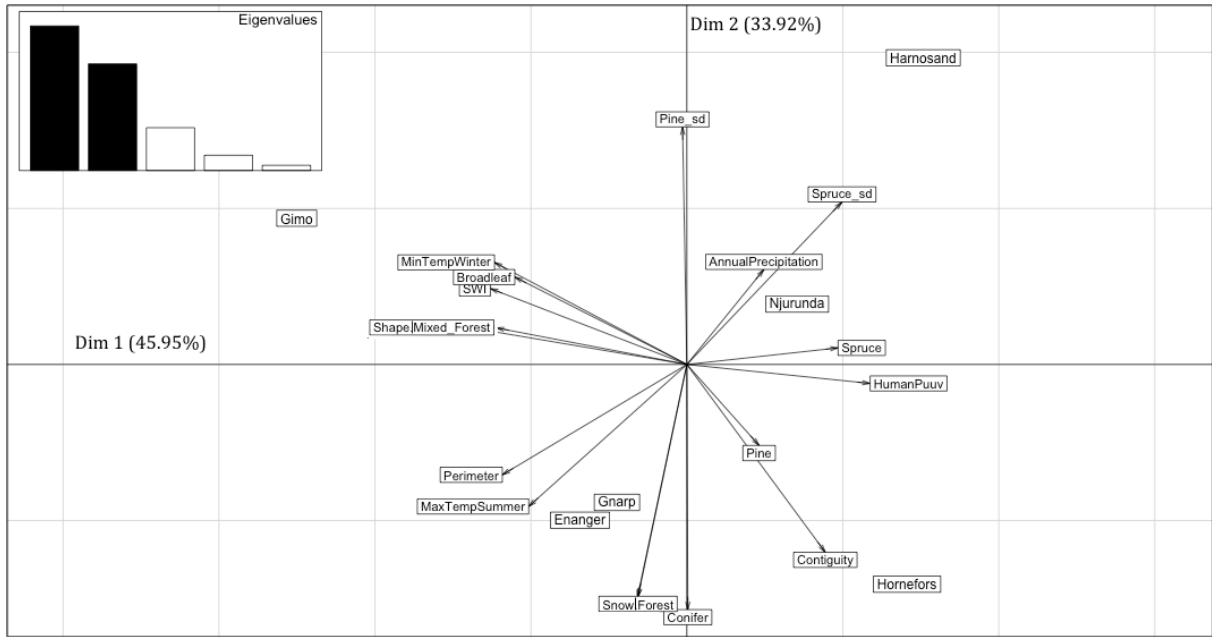

11  
12

13 **Fig. 3** Graphical representations of the *M. glareolus* population genetic structure based on the 95,988 SNPs. a) Principal Component Analysis  
14 (PCA) based on the variance covariance matrix of the six bank vole populations studied, estimated using BAYPASS and based on the 95,988  
15 SNPs included in the statistical analyses. b) Representation of the scaled covariance matrix as estimated from BAYPASS under the core model  
16 with  $\rho = 1$ . c) Isolation by distance pattern.

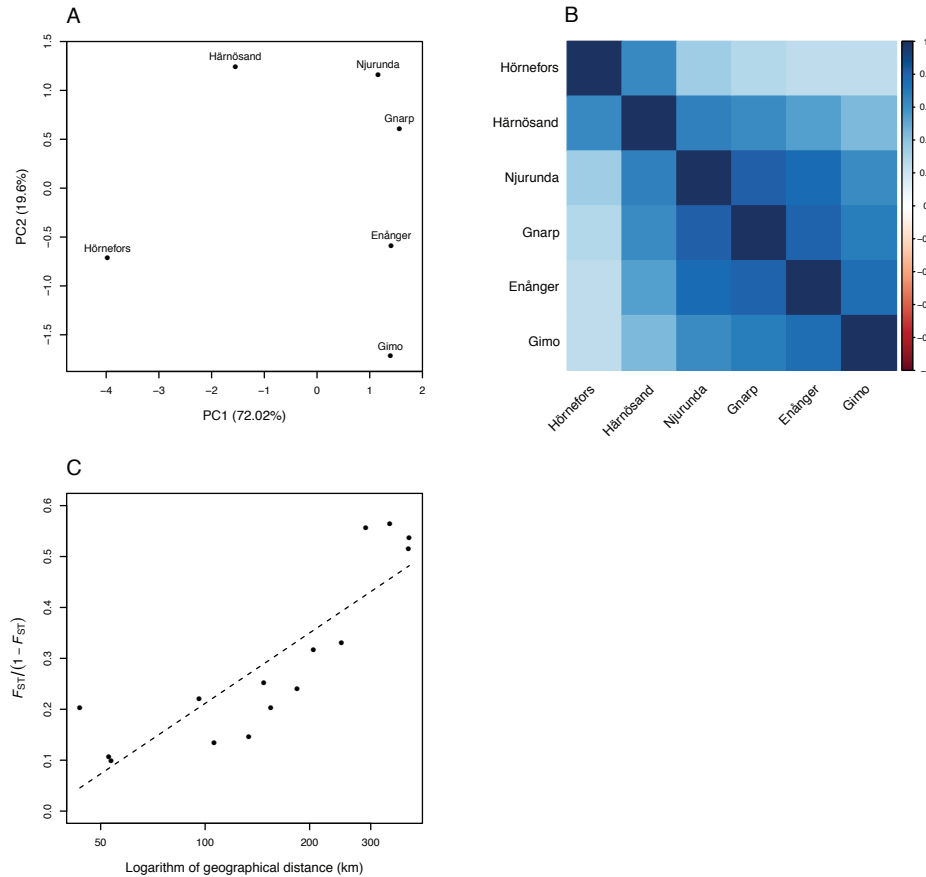

18 **Fig. 4** Outlier detection based on 95,988 SNPs in the six bank vole populations using  
19 SELESTIM. a)  $F_{ST}$  estimates are represented as a function of the Kullback-Leibler Divergence  
20 (KLD) measure for all SNPs. Vertical lines correspond to the 99.90, 99.95 and 99.99 %  
21 quantiles calculated from the KLD calibration procedure. b) Correlations between the locus-  
22 and population-specific coefficient of selection and the coordinates of the first principal  
23 components of the environmental variables. The colored lines stand for outlier SNPs, and the  
24 thin grey lines stand for all markers. The coefficient of selection was transformed as:  $2 * \sigma_{ij} * (\kappa_{ij} - 0.5)$ .  
25  
26  
27 a)

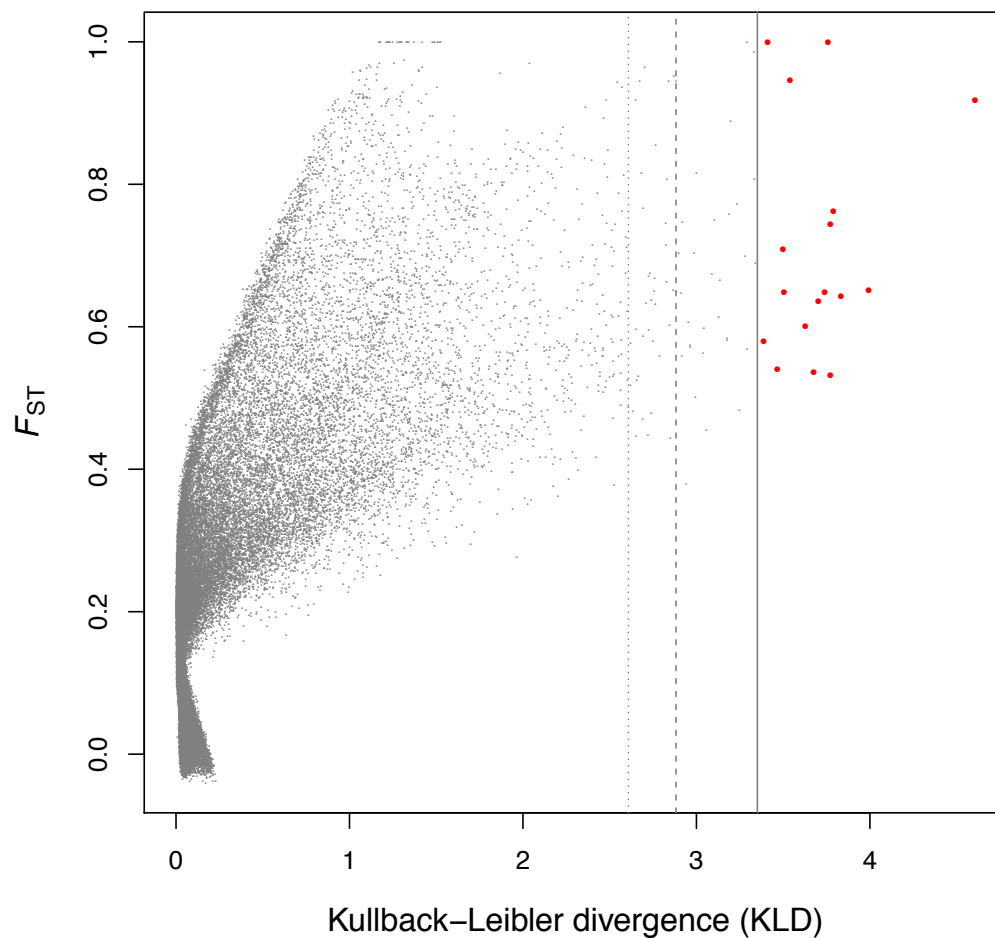

28  
29  
30 b)



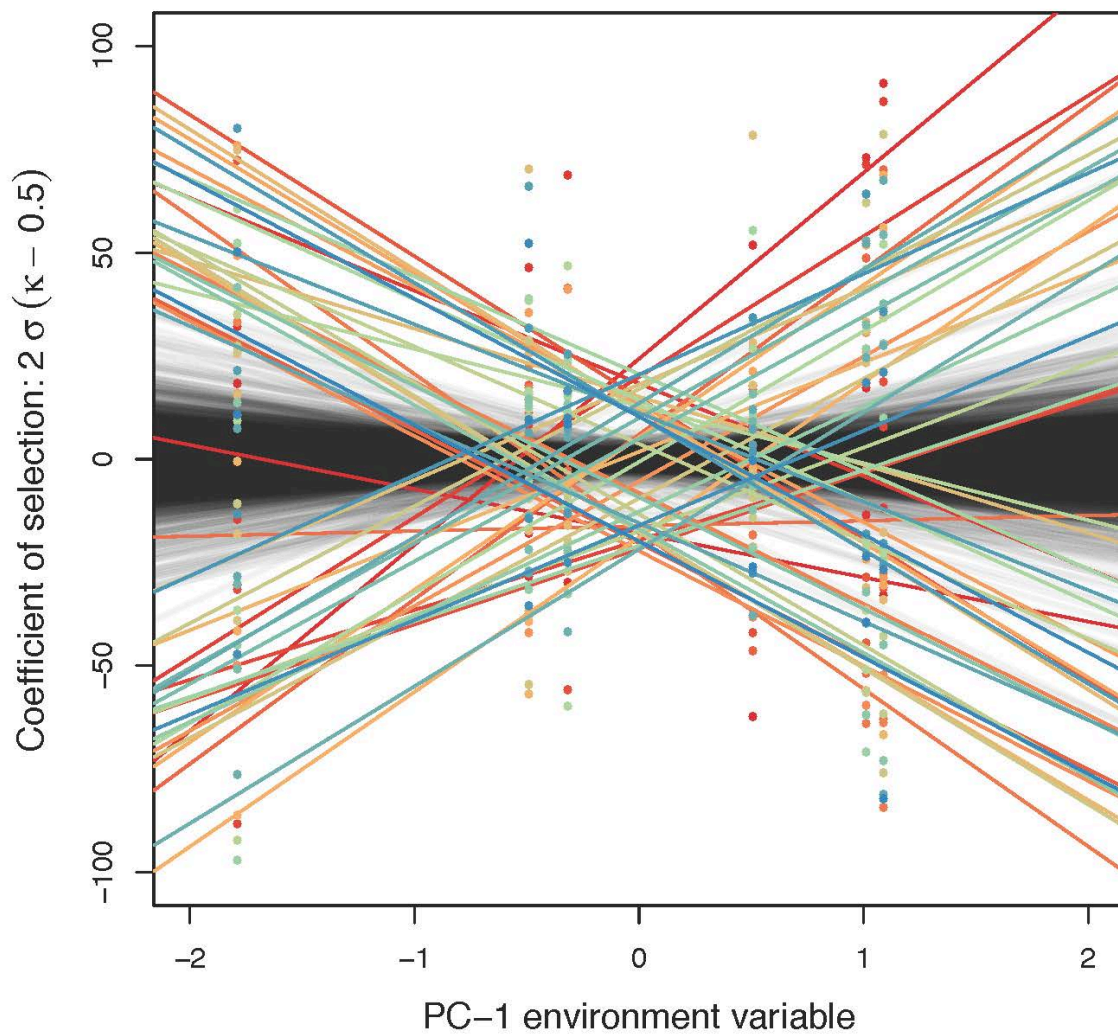

31  
32

33 **Fig. 5** Outlier detection based on 95,988 SNPs in the six bank vole populations using  
34 BAYPASS. a) Correlation between Kullback-Leibler Divergence (KLD) measure for all SNPs  
35 and the statistics  $X^T X$  estimated using BAYPASS. Horizontal lines correspond to the 99.90,  
36 99.95 and 99.99 % quantiles calculated from the KLD calibration procedure. Vertical lines  
37 correspond to these three quantiles calculated using simulations from a predictive distribution  
38 based on the observed dataset. b) Correlation between the statistics  $eBP$  (with the  
39 environmental synthetic variable being PCA axis 1) and  $X^T X$  estimated using BAYPASS.  
40 Horizontal and vertical lines correspond to the 99.90, 99.95 and 99.99 % quantiles calculated  
41 from the simulations described above. c) Correlation between the statistics  $eBP$  (with the  
42 environmental synthetic variable being PCA axis 2) and  $X^T X$  estimated using BAYPASS.  
43 Horizontal and vertical lines correspond to the 99.90, 99.95 and 99.99 % quantiles calculated  
44 from the simulations described above.  
45  
46 a)

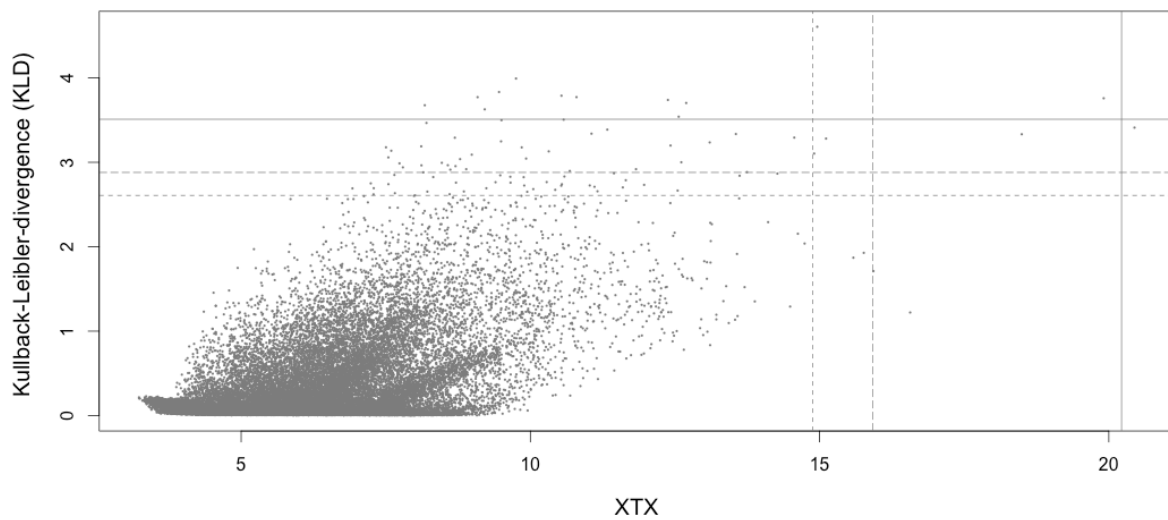

47  
48 b)

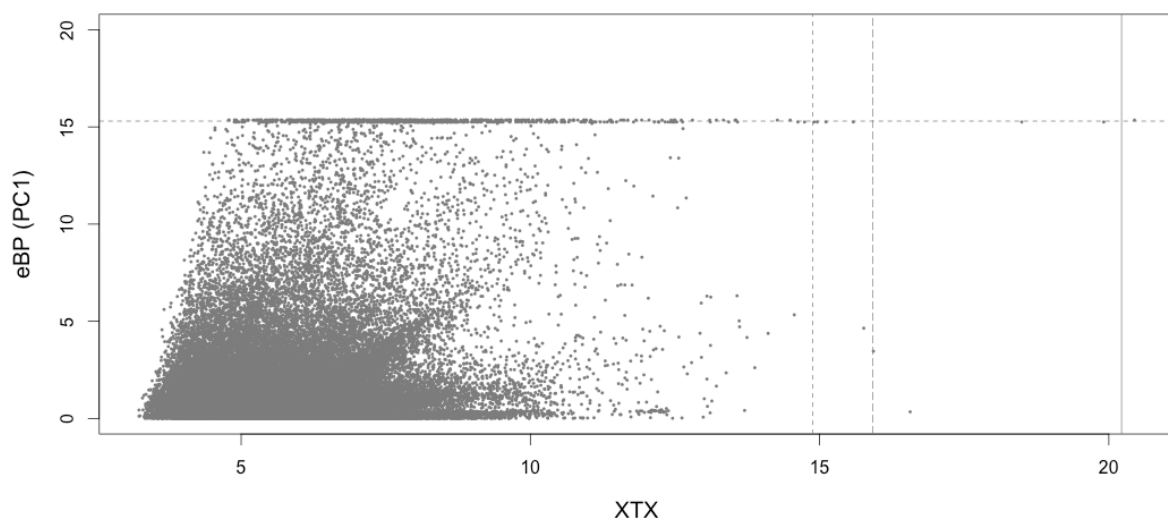

49  
50 c)

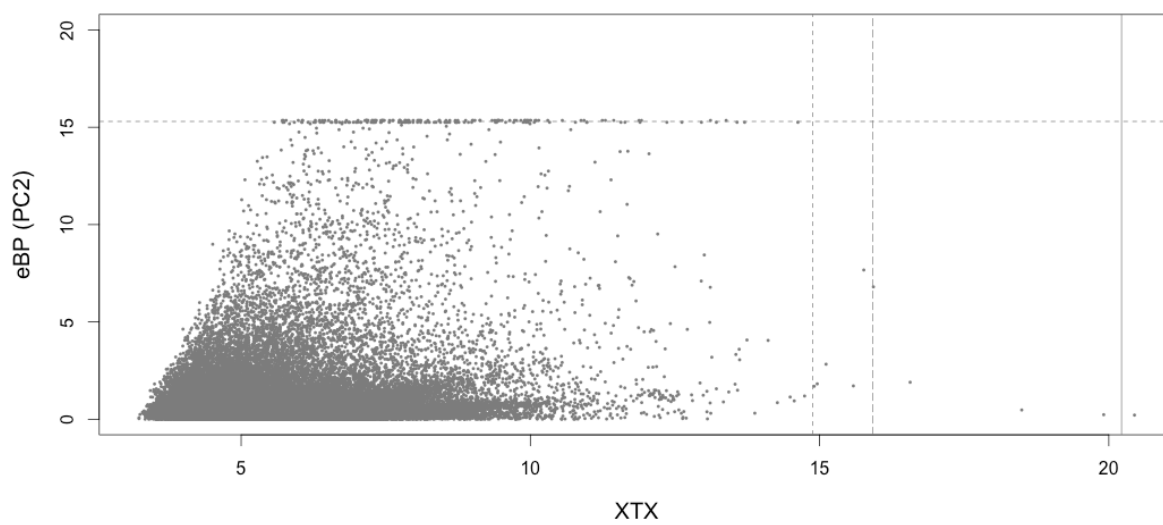

51  
52

53 **Fig. 6.** Gene network obtained with STRING including the 52 outliers with annotation based on *M. musculus* genome. Small nodes indicate  
 54 proteins of unknown 3D structure. Edges represent protein-protein associations based on known interactions (blue: from curated databases; pink:  
 55 experimentally tested, black= co-expression) or predicted ones (green= gene neighborhood).  
 56

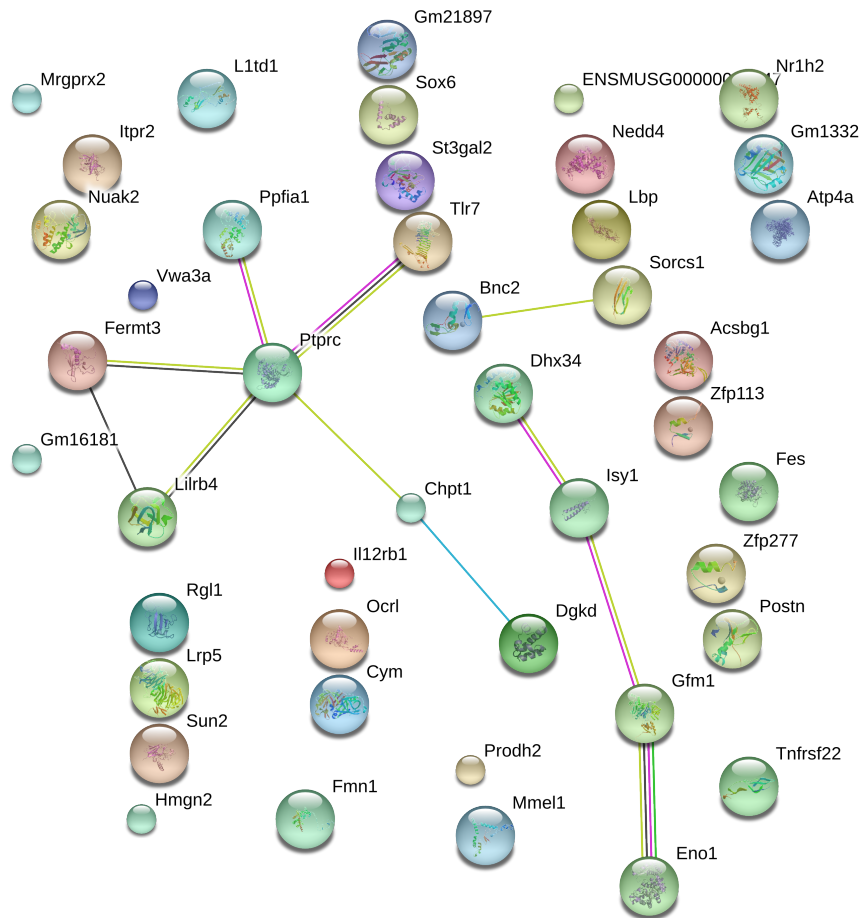

57

58 **Fig. 7** TreeMap view of REVIGO Biological Process analyses. Each rectangle represents a single cluster, that are grouped into ‘superclusters’ of  
 59 related terms, represented with different colors. The size of the rectangles reflects the frequency of the GO term in the set of outliers included in  
 60 this analysis.  
 61

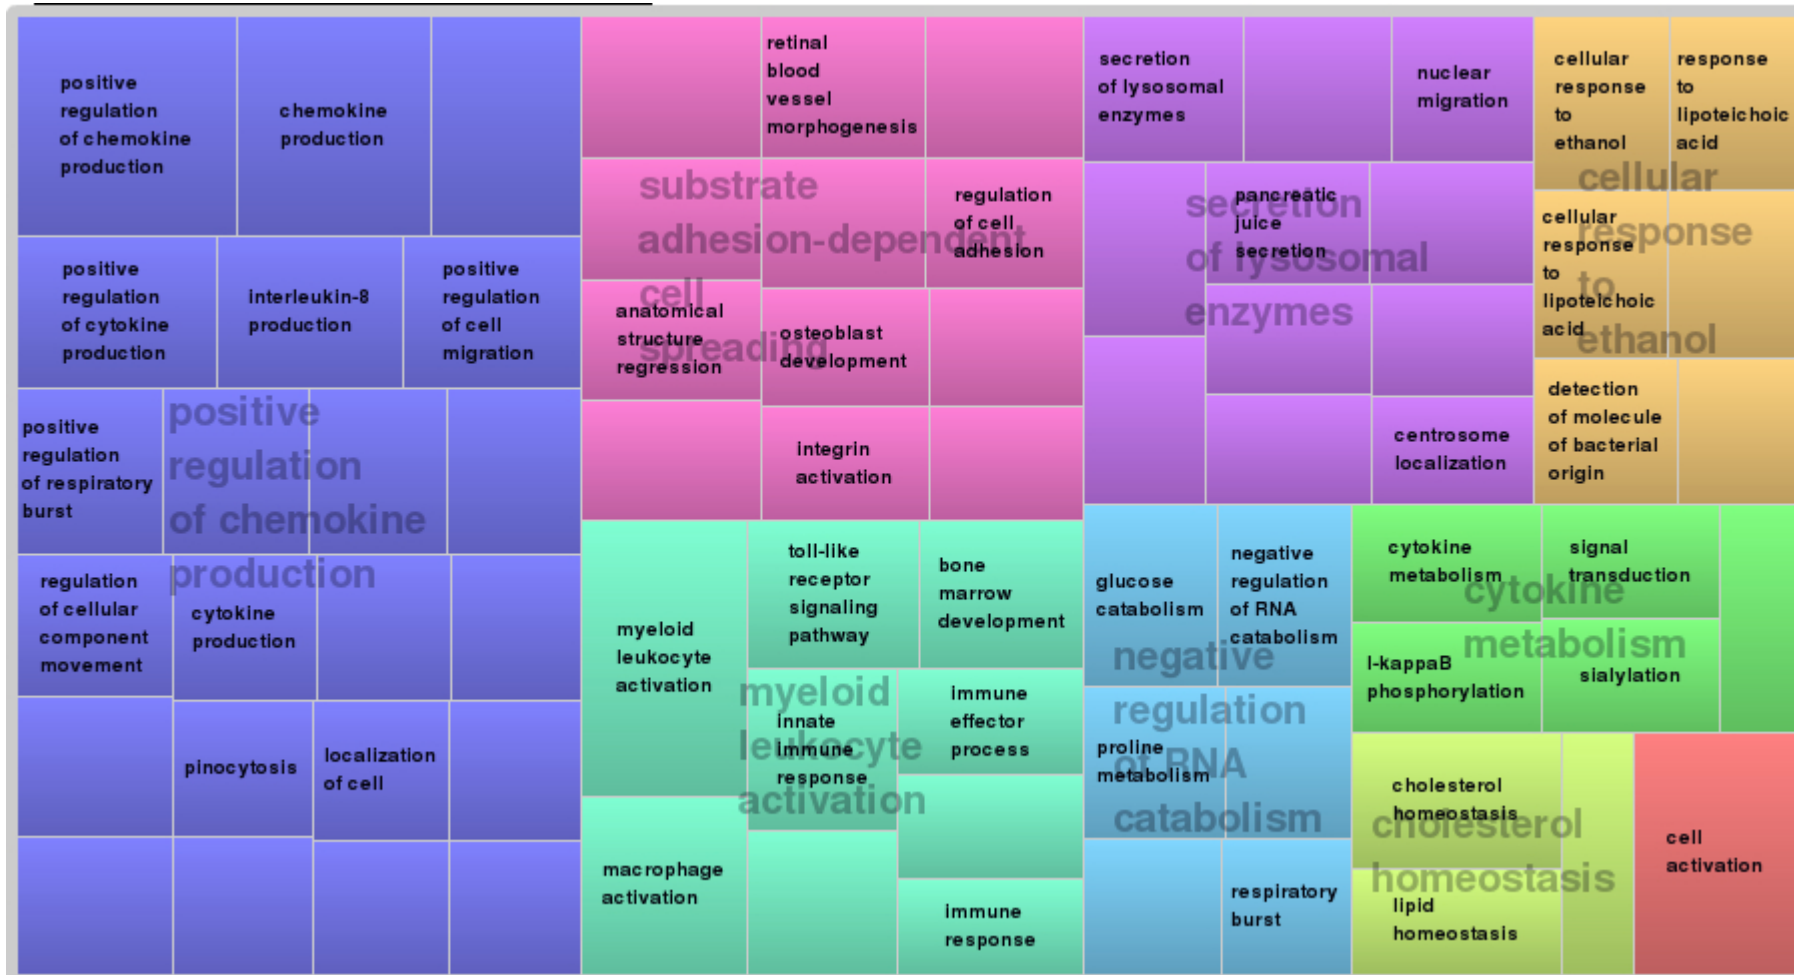

62

1 **Table 1.** Sampling information, including localities of sampling and their administrative county, geographic coordinates (centre point  
 2 from where the voles are trapped, voles are all caught within 1 kilometer from that point), the number of voles trapped *N*, the date of  
 3 sampling, and the minimum, maximum and total number of human cases reported per county between 2001 and 2011 (SMI data).

4

| Localities | County         | Latitude      | Longitude     | <i>N</i> | Date of sampling | PUUV – Human cases               |
|------------|----------------|---------------|---------------|----------|------------------|----------------------------------|
|            |                |               |               |          |                  | Min / Max / Total / Pop.<br>size |
| Hörnefors  | Västerbotten   | N 63° 33' 50" | E 19° 47' 20" | 49       | April 2012       | 13 / 808 / 2152 / 259,239        |
| Härnösand  | Västerbotten   | N 62° 29' 30" | E 17° 49' 00" | 57       | April 2012       | 13 / 808 / 2152 / 259,239        |
| Njurunda   | Vasternorrland | N 62° 15' 15" | E 17° 29' 45" | 20       | April 2012       | 14 / 391 / 1289 / 242,347        |
|            |                |               |               | 14       | October 2012     |                                  |
| Gnarp      | Gävleborg      | 61° 51' 15"   | 17° 12' 10"   | 47       | October 2012     | 4 / 58 / 219 / 276,323           |
| Enånger    | Gävleborg      | 61° 25' 25"   | 16° 57' 58"   | 28       | October 2012     | 4 / 58 / 219 / 276,323           |
| Gimo       | Uppsala        | 60° 33' 36"   | 17° 50' 06"   | 25       | April 2012       | 1 / 15 / 95 / 200,032            |
|            |                |               |               | 17       | October 2012     |                                  |

5

6 **Table 2.** Environmental parameters and their potential impacts (indicated by 'x') on the bank voles' abundance or virus survival outside  
7 the host (see Zeimes et al., 2015 for references).

8

| <b>Variables</b>                                                | <b>Bank voles</b> | <b>Virus</b> | <b>Resolution</b>    | <b>Units</b>    | <b>Sources</b> |
|-----------------------------------------------------------------|-------------------|--------------|----------------------|-----------------|----------------|
| PUUV presence                                                   |                   |              |                      |                 |                |
| Total number of human cases between 2001 and 2011 (SWI dataset) |                   | x            | County               |                 |                |
| Climatic variables                                              |                   |              |                      |                 |                |
| Minimum temperature in winter (MinTempWinter)                   | x                 | x            | 0.0083°<br>1950-2000 | °C              | Worldclim      |
| Maximum temperature in summer (MaxTempSummer)                   |                   | x            | 0.0083°<br>1950-2000 | °C              | Worldclim      |
| Snow cover (Snow)                                               | x                 | x            | 0.005°<br>2000-2008  | Area percentage | MODIS          |
| Annul precipitation (Pp)                                        | x                 | x            | 0.0083°              | mm              | Worldclim      |

|                                            |   |   |                    |                    |                   |
|--------------------------------------------|---|---|--------------------|--------------------|-------------------|
|                                            |   |   | 1950-2000          |                    |                   |
| Forest and soil indices                    |   |   |                    |                    |                   |
| Proportion of forest                       | x |   | 100 m              | Area percentage    | Corine 2006 (EEA) |
| Proportion of broadleaved forest           | x |   | 100 m              | Area percentage    | Corine 2006 (EEA) |
| Proportion of coniferous forest            | x |   | 100 m              | Area percentage    | Corine 2006 (EEA) |
| Proportion of mixed forest                 | x |   | 100 m              | Area percentage    | Corine 2006 (EEA) |
| Mean volume of spruce                      | x |   | 25 m               | m <sup>3</sup> /ha | SLU Skogskarta    |
| Standard deviation of the volume of spruce | x |   | 25 m               | m <sup>3</sup> /ha | SLU Skogskarta    |
| Mean volume of pine                        | x |   | 25 m               | m <sup>3</sup> /ha | SLU Skogskarta    |
| Standard deviation of the volume of pine   | x |   | 25 m               | m <sup>3</sup> /ha | SLU Skogskarta    |
| Average contiguity index of forest patches | x |   | 1:20000            | Relative unit      | Lantmäteriet      |
| Average shape index of forest patches      | x |   | 1:20000            | Relative unit      | Lantmäteriet      |
| Perimeter of the forest patches            | x |   | 1:20000            | m                  | Lantmäteriet      |
| Soil water index (SWI)                     | x | x | 25 km<br>2007-2010 | Relative unit      | TU-WIEN           |



10 **Table 3.** Summary of sequenced candidate immune-related genes of bank voles (n=12). More details about these SNPs are provided in  
 11 Table S3. \* This insertion/deletion was only polymorph in Germany. \*\* one was not genotyped because of 100% LD with the other one,  
 12 the non synonymous SNP was only polymorph in France. \*\*\* The other SNPs were either only detected in one individual from France or  
 13 only detected in Germany. \*\*\*\* Only one SNP shown to be involved in PUUV / *M. glareolus* interaction (Guivier et al., 2014; Guivier et al.,  
 14 2010) was genotyped.

15

| Gene name                              | Description of gene<br>function                              | Fragment length /<br>Total length | SNP detected* | SNP genotyped | Genbank             |
|----------------------------------------|--------------------------------------------------------------|-----------------------------------|---------------|---------------|---------------------|
| <i>Myxovirus resistance<br/>(Mx2)</i>  | Interferon-induced<br>antiviral protein                      |                                   |               |               |                     |
| exon 13                                |                                                              | 226 / 246                         | 1             | 0*            | KX463515 - KX463526 |
| exon 14                                |                                                              | 205 / 237                         | 3             | 1**           | KX463527 - KX463563 |
| <i>Toll-like receptor 4<br/>(Tlr4)</i> | Pattern-recognition<br>receptor; primarily<br>recognizes LPS |                                   |               |               |                     |
| exon 3                                 |                                                              | 1888 / 2843                       | 14            | 5***          | KX463564 - KX463604 |
| <i>Toll-like receptor 7</i>            | Pattern-recognition                                          |                                   |               |               |                     |

|                           |                                    |             |   |       |                     |
|---------------------------|------------------------------------|-------------|---|-------|---------------------|
| <i>(Tlr7)</i>             | receptor; primarily                |             |   |       |                     |
| exon 3                    | recognizes ss RNA<br>virus genomes | 2916 / 3153 | 1 | 1     | KX463605 - KX463616 |
| <i>Tumor necrosis</i>     | Cytokine involved in               | 560 / 644   | 7 | 1**** | HM107872.1          |
| <i>factor alpha (Tnf)</i> | pro-inflammatory                   |             |   |       |                     |
| promoter                  | immune response                    |             |   |       |                     |

16

17

**Table 4.** Diversity indices per sampling locality and SNP. Values in bold indicate significant *p*-values.

| SNP        | Indices  | Localities   |              |              |        |         |              |
|------------|----------|--------------|--------------|--------------|--------|---------|--------------|
|            |          | Hörnesand    | Härneförs    | Njurunda     | Gnarp  | Enånger | Gimo         |
| Mx2_14_162 | He n.b.  | 0.4639       | 0.1759       | 0.000        | 0.000  | 0.000   | 0.000        |
|            | Hobs.    | 0.4694       | 0.1579       | 0.000        | 0.000  | 0.000   | 0.000        |
|            | Fis W.C. | -0.012       | 0.103        | -            | -      | -       | -            |
| TLR4_667   | He n.b.  | 0.000        | 0.000        | 0.0294       | 0.1311 | 0.1726  | 0.5065       |
|            | Hobs.    | 0.000        | 0.000        | 0.0294       | 0.1389 | 0.1875  | 0.2703       |
|            | Fis W.C. | -            | -            | 0.000        | -0.061 | -0.088  | <b>0.470</b> |
| TLR4_776   | He n.b.  | 0.0600       | 0.0517       | 0.2950       | 0.4261 | 0.4583  | 0.2755       |
|            | Hobs.    | 0.0612       | 0.0526       | 0.2941       | 0.4286 | 0.5000  | 0.1622       |
|            | Fis W.C. | -0.021       | -0.018       | 0.003        | -0.006 | -0.093  | <b>0.415</b> |
| TLR4_1146  | He n.b.  | 0.0791       | 0.0517       | 0.2950       | 0.4409 | 0.4583  | 0.2755       |
|            | Hobs.    | 0.0816       | 0.0526       | 0.2941       | 0.4167 | 0.5000  | 0.1622       |
|            | Fis W.C. | -0.032       | -0.018       | 0.003        | 0.056  | -0.093  | <b>0.415</b> |
| TLR4_1662  | He n.b.  | 0.0600       | 0.0517       | 0.3021       | 0.4343 | 0.4583  | 0.2936       |
|            | Hobs.    | 0.0612       | 0.0526       | 0.3030       | 0.4054 | 0.5000  | 0.1892       |
|            | Fis W.C. | -0.021       | -0.018       | -0.003       | 0.067  | -0.093  | <b>0.359</b> |
| TLR4_1687  | He n.b.  | 0.0412       | 0.0517       | 0.2950       | 0.4409 | 0.4583  | 0.2755       |
|            | Hobs.    | 0.0417       | 0.0526       | 0.2941       | 0.4167 | 0.5000  | 0.1622       |
|            | Fis W.C. | -0.011       | -0.018       | 0.003        | 0.056  | -0.093  | <b>0.415</b> |
| TLR7_2593  | He n.b.  | 0.0000       | 0.3552       | 0.1383       | 0.4261 | 0.5079  | 0.0000       |
|            | Hobs.    | 0.0000       | 0.1404       | 0.1471       | 0.3143 | 0.3750  | 0.0000       |
|            | Fis W.C. | -            | <b>0.607</b> | -0.065       | 0.265  | 0.265   | -            |
| TNFp_296   | He n.b.  | 0.4033       | 0.4988       | 0.3652       | 0.2950 | 0.2285  | 0.4832       |
|            | Hobs.    | 0.0204       | 0.0175       | 0.1765       | 0.2941 | 0.1935  | 0.2432       |
|            | Fis W.C. | <b>0.950</b> | <b>0.965</b> | <b>0.521</b> | 0.003  | 0.155   | <b>0.500</b> |

21 **Table 5.** Outlier SNPs identified using at least one of the three methods implemented to detect signatures of selection : SelEstim, BayPass  
 22 and BayPass with environmental variables (respectively when associations were found with PC1 or PC2). Only SNPS that belonged to  
 23 contigs that aligned to the mouse genome and corresponded to genes coding for proteins are included here. Gene name and description  
 24 were obtained in Pathway are indicated following KEGG or Reactom results. Genes related to immunity are indicated by \*. Those related  
 25 to metabolism processes are indicated by #.

26

| Gene ID<br>(Ensembl) | SNP<br>(MRK_RAD) | Consensus<br>Sequence | Gene<br>abbreviation and<br>synonyms | Gene name and description                  | Method<br>of outlier<br>detection | Pathway                                   |
|----------------------|------------------|-----------------------|--------------------------------------|--------------------------------------------|-----------------------------------|-------------------------------------------|
| ENSMUSG000000094472  | 61<br>62         | C100162               | Gm21897                              | Uncharacterized protein                    | KLD<br>X <sup>r</sup> X<br>eBP-1  | -                                         |
| *ENSMUSG00000003038  | 84025            | C7205                 | Hmgn2, HMG-17,<br>Hmg17              | High mobility group<br>nucleosomal binding | KLD                               | Metabolic pathways<br>Glycerophospholipid |

|                     |       |         |                                                                                            |                                                                                                                                                     |     |                                                              |
|---------------------|-------|---------|--------------------------------------------------------------------------------------------|-----------------------------------------------------------------------------------------------------------------------------------------------------|-----|--------------------------------------------------------------|
|                     |       |         |                                                                                            | inner side of the<br>nucleosomal DNA thus<br>altering the interaction<br>between the DNA and the<br>histone octamer                                 |     | Choline metabolism<br>in cancer<br>Ether lipid<br>metabolism |
| ENSMUSG0000006019   | 55395 | C261693 | Dhx34,<br>1200013B07Rik,<br>1810012L18Rik,<br>Ddx34,<br>mKIAA0134                          | DEAH (Asp-Glu-Ala-His)<br>box polypeptide 34;<br>Probable ATP-binding RNA<br>helicase                                                               | KLD | -                                                            |
| *ENSMUSG00000010751 | 34586 | C194382 | Tnfrsf22,<br>2810028K06Rik,<br>C130035G06Rik,<br>SOBa, Tnfrh2,<br>Tnfrsf1a2,<br>mDcTrailr2 | Tumor necrosis factor<br>receptor superfamily,<br>member 22; Receptor for<br>the cytotoxic ligand<br>TNFSF10/TRAIL. Protects<br>cells against TRAIL | KLD | -                                                            |

| mediated apoptosis  |       |         |                                                                  |                                                                                                                                                                  |     |                                                                                                                      |
|---------------------|-------|---------|------------------------------------------------------------------|------------------------------------------------------------------------------------------------------------------------------------------------------------------|-----|----------------------------------------------------------------------------------------------------------------------|
| *ENSMUSG00000026395 | 13196 | C134235 | Ptprc, B220,<br>CD45R, Cd45, L-<br>CA, Ly-5, Lyt-4,<br>T200, loc | Protein tyrosine<br>phosphatase, receptor type,<br>C; Protein tyrosine-protein<br>phosphatase required for<br>T-cell activation through<br>the antigen receptor. | KLD | Cell adhesion<br>molecules (CAMs)<br>Fc gamma R-<br>mediated<br>phagocytosis<br>T cell receptor<br>signaling pathway |
| ENSMUSG00000026482  | 35102 | C195922 | Rgl1, Rgl,<br>mKIAA0959                                          | Ral guanine nucleotide<br>dissociation stimulator,-<br>like 1; Probable guanine<br>nucleotide exchange factor                                                    | KLD | Metabolism<br>Ras signaling<br>pathway                                                                               |
| *ENSMUSG00000032281 | 23560 | C161736 | Acsbg1, BG1,<br>Bgm,<br>E230019G03Rik,<br>Lpd, R75185,           | Acyl-CoA synthetase<br>bubbligum family member<br>1; Mediates activation of<br>long-chain fatty acids for                                                        | KLD | Metabolic pathways<br>Fatty acid<br>metabolism<br>Adipocytokine                                                      |

|                    |       |         |                                     |                                                                                                                                                                                                                        |     |                                             |
|--------------------|-------|---------|-------------------------------------|------------------------------------------------------------------------------------------------------------------------------------------------------------------------------------------------------------------------|-----|---------------------------------------------|
|                    |       |         | mKIAA0631                           | both synthesis of cellular lipids, and degradation via beta-oxidation                                                                                                                                                  |     | signaling pathway<br>Fatty acid degradation |
| ENSMUSG00000051910 | 59381 | C276731 | Sox6, AI987981, SOX-LZ              | SRY-box containing gene 6; Transcriptional activator. Plays a key role in several developmental processes,                                                                                                             | KLD | -                                           |
| ENSMUSG00000053158 | 12626 | C132789 | Fes, AI586313, BB137047, FPS, c-fes | Feline sarcoma oncogene; Tyrosine-protein kinase that acts downstream of cell surface receptors and plays a role in the regulation of the actin cytoskeleton, microtubule assembly, cell attachment and cell spreading | KLD | Axon guidance                               |

|                    |       |                   |                                                       |                                                                                                                                                                                                                                                             |              |                                    |
|--------------------|-------|-------------------|-------------------------------------------------------|-------------------------------------------------------------------------------------------------------------------------------------------------------------------------------------------------------------------------------------------------------------|--------------|------------------------------------|
| ENSMUSG00000024913 | 62875 | C290668           | Lrp5, BMND1,<br>HBM, LR3, LRP7,<br>OPPG,<br>mKIAA4142 | Low density lipoprotein<br>receptor-related protein 5;<br>Component of the Wnt-Fzd-<br>LRP5-LRP6 complex that<br>triggers beta-catenin<br>signaling through inducing<br>aggregation of receptor-<br>ligand complexes into<br>ribosome-sized<br>signalsomes. | KLD<br>eBP-1 | Wnt signaling<br>pathway           |
| ENSMUSG00000043531 | 32706 | C188407           | Sorcs1, Sorcs,                                        | VPS10 domain receptor                                                                                                                                                                                                                                       | KLD          | -                                  |
|                    | 86077 | C76715            | mSorCS                                                | protein SORCS 1                                                                                                                                                                                                                                             | eBP-1        |                                    |
| ENSMUSG00000044583 |       | Candidate<br>gene | Tlr7                                                  | Toll-like receptor 7; Key<br>component of innate and<br>adaptive immunity                                                                                                                                                                                   | KLD<br>eBP-1 | Toll receptor<br>signaling pathway |



|                     |       |         |                              |                                                                                                                                                                        |       |                                                                                                                |
|---------------------|-------|---------|------------------------------|------------------------------------------------------------------------------------------------------------------------------------------------------------------------|-------|----------------------------------------------------------------------------------------------------------------|
| *ENSMUSG00000000791 | 89604 | C84915  | Il12rb1, CD212,<br>IL-12R[b] | Interleukin 12 receptor,<br>beta 1; Functions as an<br>interleukin receptor which<br>binds interleukin-12 with<br>low affinity and is involved<br>in IL12 transduction | eBP-1 | Cytokine-cytokine<br>receptor interaction<br>Jak-STAT signaling<br>pathway<br>Interleukin signaling<br>pathway |
| *ENSMUSG00000001173 | 38137 | C204541 | Ocrl,                        | Oculocerebrorenal                                                                                                                                                      | eBP-1 | Metabolic pathways                                                                                             |
|                     | 48974 | C239849 | 9530014D17Rik,               | syndrome of Lowe;                                                                                                                                                      |       | Inositol phosphate                                                                                             |
|                     | 51765 | C248728 | BB143339,                    | Converts                                                                                                                                                               |       | metabolism                                                                                                     |
|                     | 69107 | C37197  | OCRL1                        | phosphatidylinositol 4,5-                                                                                                                                              |       | Phosphatidylinositol                                                                                           |
|                     | 83890 | C71726  |                              | bisphosphate to<br>phosphatidylinositol 4-<br>phosphate                                                                                                                |       | signaling system                                                                                               |
| *ENSMUSG00000005553 | 66006 | C30857  | Atp4a                        | ATPase, H <sup>+</sup> /K <sup>+</sup> exchanging,<br>gastric, alpha polypeptide;<br>Catalyzes the hydrolysis of                                                       | eBP-1 | Oxidative<br>phosphorylation<br>Gastric acid                                                                   |

|                     |       |         |                                                         |                                                                                                                                                                  |       |                                                                                                                    |
|---------------------|-------|---------|---------------------------------------------------------|------------------------------------------------------------------------------------------------------------------------------------------------------------------|-------|--------------------------------------------------------------------------------------------------------------------|
|                     |       |         |                                                         | ATP coupled with the<br>exchange of H(+) and K(+)<br>ions across the plasma<br>membrane                                                                          |       | secretion<br>Collecting duct acid<br>secretion                                                                     |
| *ENSMUSG0000009772  | 53579 | C255238 | Nuak2,<br>1200013B22Rik,<br>Omphk2, Snark,<br>mKIAA0537 | NUAK family, SNF1-like<br>kinase, 2; Stress-activated<br>kinase involved in<br>tolerance to glucose<br>starvation.                                               | eBP-1 |                                                                                                                    |
| *ENSMUSG00000016024 | 94448 | C96304  | Lbp, Bpifd2,<br>Ly88                                    | Lipopolysaccharide binding<br>protein; Binds to the lipid A<br>moiety of bacterial<br>lipopolysaccharides (LPS)<br>and acts as an affinity<br>enhancer for CD14. | eBP-1 | NF-kappa B<br>signaling pathway<br>Toll-like receptor<br>signaling pathway<br>Salmonella infection<br>Tuberculosis |
| *ENSMUSG00000024965 | 71214 | C41693  | Fermt3, C79673,                                         | Fermitin family homolog 3                                                                                                                                        | eBP-1 | Platelet activation                                                                                                |

|                    |          |         |                                                            |                                                                                                                                                                                                                    |       |   |
|--------------------|----------|---------|------------------------------------------------------------|--------------------------------------------------------------------------------------------------------------------------------------------------------------------------------------------------------------------|-------|---|
|                    |          |         | Kindlin3                                                   | (Drosophila); Plays a central role in cell adhesion in hematopoietic cells. Acts by activating the integrin beta-1-3 required for integrin-mediated platelet adhesion and leukocyte adhesion to endothelial cells. |       |   |
| ENSMUSG00000027750 | 47669    | C235550 | Postn, A630052E07Rik, AI747096, OSF-2, Osf2, PLF, PN, peri | Periostin, osteoblast specific factor; Induces cell attachment and spreading and plays a role in cell adhesion.                                                                                                    | eBP-1 | - |
| ENSMUSG00000027774 | 10489-97 | C12723  | Gfm1                                                       | G elongation factor, mitochondrial 1.                                                                                                                                                                              | eBP-1 |   |

|                     |       |         |                                                       |                                                                                                |       |                                                                                        |
|---------------------|-------|---------|-------------------------------------------------------|------------------------------------------------------------------------------------------------|-------|----------------------------------------------------------------------------------------|
| ENSMUSG00000028487  | 5793  | C114918 | Bnc2                                                  | Basonuclin 2; Probable transcription factor specific for skin keratinocytes.                   | eBP-1 |                                                                                        |
| ENSMUSG00000030056  | 23902 | C162542 | Isy1,<br>5830446M03Rik,<br>AI181014,<br>AU020769      | ISY1 splicing factor homolog ( <i>S. cerevisiae</i> );<br>May play a role in pre-mRNA splicing | eBP-1 | Spliceosome                                                                            |
| *ENSMUSG00000031749 | 26707 | C170555 | St3gal2,<br>AI429591,<br>AW822065,<br>ST3GalII, Siat5 | ST3 beta-galactoside alpha-2,3-sialyltransferase 2.                                            | eBP-1 | Metabolic pathways<br>Glycosphingolipid biosynthesis<br>Glycosaminoglycan biosynthesis |
| *ENSMUSG00000032216 | 48950 | C23976  | Nedd4,<br>AA959633,<br>AL023035,<br>AU019897,         | Neural precursor cell expressed, developmentally down-regulated 4; E3 ubiquitin-protein ligase | eBP-1 | Immune System<br>Ubiquitin mediated proteolysis<br>Epstein-Barr virus                  |

|                     |       |        |                                                                       |                                                                                                                                                                                 |       |                                                             |
|---------------------|-------|--------|-----------------------------------------------------------------------|---------------------------------------------------------------------------------------------------------------------------------------------------------------------------------|-------|-------------------------------------------------------------|
|                     |       |        | E430025J12Rik,<br>Nedd4-1,<br>Nedd4a,<br>mKIAA0093                    | which accepts ubiquitin<br>from an E2 ubiquitin-<br>conjugating enzyme in the<br>form of a thioester and then<br>directly transfers the<br>ubiquitin to targeted<br>substrates. |       | infection                                                   |
| *ENSMUSG00000036892 | 91136 | C88644 | Prodh2,<br>2510028N04Rik,<br>2510038B11Rik,<br>MmPOX,<br>MmPOX1, POX1 | Proline dehydrogenase<br>(oxidase) 2; Converts<br>proline to delta-1-<br>pyrroline-5-carboxylate                                                                                | eBP-1 | Metabolic pathways<br>Arginine and proline<br>metabolism    |
| ENSMUSG00000037519  | 86924 | C78794 | Ppfia1,<br>C030014K08Rik,<br>C87158, LIP.1,<br>LIP1                   | Protein tyrosine<br>phosphatase, receptor type,<br>f polypeptide (PTPRF),<br>interacting protein (liprin),                                                                      | eBP-1 | Neuronal System<br>Transmission across<br>Chemical Synapses |

|                    |         |         |                                                  | alpha 1                                                                                                                                                                                                                                                                                          |       |                                           |
|--------------------|---------|---------|--------------------------------------------------|--------------------------------------------------------------------------------------------------------------------------------------------------------------------------------------------------------------------------------------------------------------------------------------------------|-------|-------------------------------------------|
| ENSMUSG00000042524 | 37922   | C203929 | Sun2,<br>B230369L08Rik,<br>C030011B15,<br>Unc84b | Sad1 and UNC84 domain<br>containing 2; Component of<br>SUN-protein-containing<br>multivariate complexes<br>also called LINC complexes<br>which link the<br>nucleoskeleton and<br>cytoskeleton by providing<br>versatile outer nuclear<br>membrane attachment sites<br>for cytoskeletal filaments | eBP-1 | Meiotic synapsis<br>Cell Cycle<br>Meiosis |
| ENSMUSG00000044042 | 42927-8 | C21976  | Fmn1                                             | Formin 1; Plays a role in<br>the formation of adherens<br>junction and the<br>polymerization of linear                                                                                                                                                                                           | eBP-1 | -                                         |

| actin cables.       |       |         |                   |                             |         |                     |
|---------------------|-------|---------|-------------------|-----------------------------|---------|---------------------|
| ENSMUSG00000055917  | 2024  | C105390 | Zfp277,           | Zinc finger protein 277     | EpBPis1 | -                   |
|                     | 20453 | C153598 | 2410017E24Rik,    |                             |         |                     |
|                     | 78750 | C59434  | NIRF4             |                             |         |                     |
| ENSMUSG00000057047  | 21103 | C15518  | 1700010B08Rik     | RIKEN cDNA 1700010B08       | eBP-1   | -                   |
|                     |       |         |                   | gene                        |         |                     |
| ENSMUSG00000058183  | 14341 | C13737  | Mmel1, Mell1,     | Membrane metallo-           | eBP-1   | -                   |
|                     |       |         | NEP2, NEPII, NI1, | endopeptidase-like 1;       |         |                     |
|                     |       |         | SEP               | Metalloprotease involved in |         |                     |
|                     |       |         |                   | sperm function, possibly by |         |                     |
|                     |       |         |                   | modulating the processes    |         |                     |
|                     |       |         |                   | of fertilization and early  |         |                     |
|                     |       |         |                   | embryonic developmen        |         |                     |
| *ENSMUSG00000060002 | 39654 | C209068 | Chpt1             | Choline                     | eBP-1   | Metabolic pathways  |
|                     | 43056 | C220188 |                   | phosphotransferase 1;       |         | Glycerophospholipid |

|                    |       |        |                                                                                      |                                                                                                                                                                                 |       |                                                                                                        |
|--------------------|-------|--------|--------------------------------------------------------------------------------------|---------------------------------------------------------------------------------------------------------------------------------------------------------------------------------|-------|--------------------------------------------------------------------------------------------------------|
|                    |       |        |                                                                                      | Catalyzes<br>phosphatidylcholine<br>biosynthesis from CDP-<br>choline.                                                                                                          |       | metabolism<br>Ether lipid<br>metabolism                                                                |
| ENSMUSG00000060601 | 83851 | C71650 | Nr1h2,<br>AI194859, LXR,<br>LXRB, LXRBeta,<br>NER1, OR-1,<br>RIP15, UR, Unr,<br>Unr2 | Nuclear receptor subfamily<br>1, group H, member 2;<br>Regulates cholesterol<br>uptake through MYLIP-<br>dependent ubiquitination<br>of LDLR, VLDLR and LRP8;<br>DLDLR and LRP8 | eBP-1 | Nuclear Receptor<br>transcription<br>pathway<br>Generic<br>Transcription<br>Pathway<br>Gene Expression |
| ENSMUSG00000063524 | 84862 | C73976 | Eno1,<br>0610008I15,<br>AL022784, Eno-<br>1, MBP-1                                   | Enolase 1, alpha non-<br>neuron; Multifunctional<br>enzyme that, as well as its<br>role in glycolysis, plays a<br>part in various processes                                     | eBP-1 | HIF-1 signaling<br>pathway<br>Metabolic pathways<br>Carbon metabolism<br>Biosynthesis of               |



|                     |       |         |                                                    |                                                                                    |       |                                                                                                                                                                                           |
|---------------------|-------|---------|----------------------------------------------------|------------------------------------------------------------------------------------|-------|-------------------------------------------------------------------------------------------------------------------------------------------------------------------------------------------|
|                     |       |         |                                                    | such as growth control,<br>hypoxia tolerance and<br>allergic responses             |       | amino acids<br>Glycolysis /<br>Gluconeogenesis                                                                                                                                            |
| *ENSMUSG00000070738 | 71571 | C42550  | Dgkd, AI841987,<br>D330025K09,<br>DGKdelta, dgkd-2 | Diacylglycerol kinase, delta                                                       | eBP-1 | Metabolic pathways<br>Glycerolipid<br>metabolism<br>Glycerophospholipid<br>metabolism<br>Phosphatidylinositol<br>signaling system<br>Platelet activation,<br>signaling and<br>aggregation |
| ENSMUSG00000074109  | 35853 | C198117 | Mrgprx2,<br>G370024M05Rik,<br>MrgB10,              | MAS-related GPR, member<br>X2; Probably involved in<br>the function of nociceptive | eBP-1 | -                                                                                                                                                                                         |

|                     |       |         | Mrgprb10                                                            | neurons.                                                                                                                                                                    |                |                                                                                                                               |
|---------------------|-------|---------|---------------------------------------------------------------------|-----------------------------------------------------------------------------------------------------------------------------------------------------------------------------|----------------|-------------------------------------------------------------------------------------------------------------------------------|
| ENSMUSG00000074628  | 43497 | C22169  | Tldc2, Gm1332                                                       | TBC/LysM-Associated<br>Domain Containing 2                                                                                                                                  | eBP-1          | -                                                                                                                             |
| ENSMUSG00000081650  | 16184 | C141730 | Gm16181                                                             | Predicted gene 16181                                                                                                                                                        | eBP-1          |                                                                                                                               |
| ENSMUSG00000046213  | 70760 | C40587  | Cym, Gm131                                                          | Chymosin                                                                                                                                                                    | eBP-1<br>eBP-2 | -                                                                                                                             |
| *ENSMUSG00000030287 | 56067 | C264313 | Itpr2, AI649341,<br>InsP3R-2,<br>InsP3R-5, Ip3r2,<br>Itpr5, insP3R2 | Inositol 1,4,5-triphosphate<br>receptor 2; Receptor for<br>inositol 1,4,5-<br>trisphosphate, a second<br>messenger that mediates<br>the release of intracellular<br>calcium | eBP-2          | Thyroid hormone<br>synthesis<br>Gastric acid<br>secretion<br>Pancreatic secretion<br>Phosphatidylinositol<br>signaling system |
| *ENSMUSG00000030889 | 13626 | C135480 | Vwa3a,<br>E030013G06Rik                                             | von Willebrand factor A<br>domain containing 3A                                                                                                                             | eBP-2          | Pathways in cancer<br>MAPK signaling                                                                                          |

---

pathway  
 TNF signaling  
 pathway  
 Ras signaling  
 pathway  
 Toll-like receptor  
 signaling pathway  
 FoxO signaling  
 pathway  
 RIG-I-like receptor  
 signaling pathway

---

|                     |       |        |                                        |                         |       |                                                                         |
|---------------------|-------|--------|----------------------------------------|-------------------------|-------|-------------------------------------------------------------------------|
| *ENSMUSG00000037007 | 91750 | C90068 | Zfp113,<br>4732456B05Rik,<br>mKIAA4229 | zinc finger protein 113 | eBP-2 | Metabolism<br>Metabolic disorders<br>of biological<br>oxidation enzymes |
|---------------------|-------|--------|----------------------------------------|-------------------------|-------|-------------------------------------------------------------------------|

---

---

Fatty acids

Biological oxidations

---

|                     |       |         |                                                     |                                                                                                                                                                                                                     |       |               |
|---------------------|-------|---------|-----------------------------------------------------|---------------------------------------------------------------------------------------------------------------------------------------------------------------------------------------------------------------------|-------|---------------|
| *ENSMUSG00000062593 | 62536 | C289384 | Lilrb4, CD85K,<br>Gp49b, HM18,<br>ILT3, LIR-5, gp49 | Leukocyte<br>immunoglobulin-like<br>receptor, subfamily B,<br>member 4; Receptor for<br>class I MHC antigens.<br>Involved in the down-<br>regulation of the immune<br>response and the<br>development of tolerance. | eBP-2 | Immune system |
|---------------------|-------|---------|-----------------------------------------------------|---------------------------------------------------------------------------------------------------------------------------------------------------------------------------------------------------------------------|-------|---------------|

---

|                    |       |         |                                                    |                                                |       |   |
|--------------------|-------|---------|----------------------------------------------------|------------------------------------------------|-------|---|
| ENSMUSG00000087166 | 44693 | C225538 | L1td1,<br>AA546746,<br>AB211064,<br>D76865, ECAT11 | LINE-1 type transposase<br>domain containing 1 | eBP-2 | - |
|--------------------|-------|---------|----------------------------------------------------|------------------------------------------------|-------|---|

---
